# Supplementary material for: Positive deviance for promoting dual-method contraceptive use among women in Uganda: a cluster randomized controlled trial
Source: bioRxiv or medRxiv preprint supplement (doi:10.1101/2020.10.03.20206169), 2020-10-06
Supplement: Supplementary file [file media-2.pdf]

**Supplementary Table S2. Baseline characteristics of women lost to follow up in the intervention and control groups**

| Variables                                   | Month 2      |                   |      |                      |       |         |                   |      |                      |        | Month 4      |                   |      |                      |       |         |                   |      |                      |       | Month 6      |                   |      |                      |       |         |                   |      |                      |       | Month 8      |                   |      |                      |       |         |      |       |      |       |
|---------------------------------------------|--------------|-------------------|------|----------------------|-------|---------|-------------------|------|----------------------|--------|--------------|-------------------|------|----------------------|-------|---------|-------------------|------|----------------------|-------|--------------|-------------------|------|----------------------|-------|---------|-------------------|------|----------------------|-------|--------------|-------------------|------|----------------------|-------|---------|------|-------|------|-------|
|                                             | Intervention |                   |      |                      |       | Control |                   |      |                      |        | Intervention |                   |      |                      |       | Control |                   |      |                      |       | Intervention |                   |      |                      |       | Control |                   |      |                      |       | Intervention |                   |      |                      |       | Control |      |       |      |       |
|                                             | Reached      | Lost to follow-up |      | p-value <sup>†</sup> |       | Reached | Lost to follow-up |      | p-value <sup>†</sup> |        | Reached      | Lost to follow-up |      | p-value <sup>†</sup> |       | Reached | Lost to follow-up |      | p-value <sup>†</sup> |       | Reached      | Lost to follow-up |      | p-value <sup>†</sup> |       | Reached | Lost to follow-up |      | p-value <sup>†</sup> |       | Reached      | Lost to follow-up |      | p-value <sup>†</sup> |       |         |      |       |      |       |
| n                                           | %            | n                 | %    |                      | n     | %       | n                 | %    |                      | n      | %            | n                 | %    |                      | n     | %       | n                 | %    |                      | n     | %            | n                 | %    |                      | n     | %       | n                 | %    | n                    | %     | n            | %                 |      |                      |       |         |      |       |      |       |
| <b>1) Socio-demographic characteristics</b> |              |                   |      |                      |       |         |                   |      |                      |        |              |                   |      |                      |       |         |                   |      |                      |       |              |                   |      |                      |       |         |                   |      |                      |       |              |                   |      |                      |       |         |      |       |      |       |
| <b>Age in years, mean (SD)</b>              |              |                   |      |                      |       |         |                   |      |                      |        |              |                   |      |                      |       |         |                   |      |                      |       |              |                   |      |                      |       |         |                   |      |                      |       |              |                   |      |                      |       |         |      |       |      |       |
|                                             | 30.6         | 6.5               | 29.8 | 6.7                  | 0.291 | 30.5    | 5.8               | 27.7 | 5.8                  | <0.001 | 30.4         | 6.4               | 30.5 | 6.9                  | 0.965 | 30.2    | 6.9               | 28.1 | 6.1                  | 0.006 | 30.6         | 6.4               | 29.5 | 6.8                  | 0.166 | 30.1    | 6.9               | 28.3 | 6.2                  | 0.016 | 30.6         | 6.4               | 29.5 | 7.2                  | 0.158 | 30.1    | 6.9  | 28.5  | 6.1  | 0.044 |
| <b>Education</b>                            |              |                   |      |                      |       |         |                   |      |                      |        |              |                   |      |                      |       |         |                   |      |                      |       |              |                   |      |                      |       |         |                   |      |                      |       |              |                   |      |                      |       |         |      |       |      |       |
| Never                                       | 114          | 29.8              | 31   | 32.0                 | 0.674 | 78      | 22.2              | 39   | 30.2                 | 0.070  | 122          | 30.1              | 23   | 31.1                 | 0.859 | 88      | 23.1              | 29   | 29.3                 | 0.201 | 118          | 30.0              | 27   | 31.4                 | 0.791 | 88      | 22.9              | 29   | 30.5                 | 0.119 | 119          | 29.4              | 26   | 34.7                 | 0.360 | 87      | 22.6 | 30    | 31.6 | 0.068 |
| Primary and more                            | 269          | 70.2              | 66   | 68.0                 |       | 273     | 77.8              | 90   | 69.8                 |        | 284          | 70.0              | 51   | 68.9                 |       | 293     | 76.9              | 70   | 70.7                 |       | 276          | 70.1              | 59   | 68.6                 |       | 297     | 77.1              | 66   | 69.5                 |       | 286          | 70.6              | 49   | 65.3                 |       | 298     | 77.4 | 65    | 68.4 |       |
| <b>Religion</b>                             |              |                   |      |                      |       |         |                   |      |                      |        |              |                   |      |                      |       |         |                   |      |                      |       |              |                   |      |                      |       |         |                   |      |                      |       |              |                   |      |                      |       |         |      |       |      |       |
| Christian                                   | 356          | 93.0              | 94   | 96.9                 | 0.150 | 320     | 91.2              | 116  | 89.9                 | 0.675  | 378          | 93.1              | 72   | 97.3                 | 0.170 | 345     | 90.6              | 91   | 91.9                 | 0.674 | 366          | 92.9              | 84   | 96.9                 | 0.097 | 349     | 90.7              | 87   | 91.6                 | 0.779 | 376          | 92.8              | 74   | 98.7                 | 0.055 | 349     | 90.7 | 87    | 91.6 | 0.779 |
| Muslim                                      | 27           | 7.1               | 3    | 3.1                  |       | 31      | 8.8               | 13   | 10.1                 |        | 28           | 6.9               | 2    | 2.7                  |       | 36      | 9.5               | 8    | 8.1                  |       | 28           | 7.1               | 2    | 3.1                  |       | 36      | 9.4               | 8    | 8.4                  |       | 29           | 7.2               | 1    | 1.3                  |       | 36      | 9.4  | 8     | 8.4  |       |
| <b>Wealth index</b>                         |              |                   |      |                      |       |         |                   |      |                      |        |              |                   |      |                      |       |         |                   |      |                      |       |              |                   |      |                      |       |         |                   |      |                      |       |              |                   |      |                      |       |         |      |       |      |       |
| Poor                                        | 139          | 36.29             | 37   | 38.1                 | 0.821 | 119     | 33.9              | 39   | 30.2                 | 0.070  | 142          | 35.0              | 34   | 46.0                 | 0.190 | 133     | 34.9              | 25   | 25.3                 | 0.188 | 139          | 35.3              | 37   | 43.0                 | 0.134 | 135     | 35.1              | 23   | 24.2                 | 0.119 | 143          | 35.3              | 33   | 44.0                 | 0.112 | 135     | 35.1 | 23    | 24.2 | 0.119 |
| Middle                                      | 133          | 34.73             | 35   | 36.1                 |       | 93      | 26.5              | 48   | 37.2                 |        | 145          | 35.7              | 23   | 31.1                 |       | 108     | 28.4              | 33   | 33.3                 |       | 136          | 34.5              | 32   | 37.2                 |       | 111     | 28.8              | 30   | 31.6                 |       | 140          | 34.6              | 28   | 37.3                 |       | 111     | 28.8 | 30    | 31.6 |       |
| Rich                                        | 111          | 28.98             | 25   | 25.8                 |       | 139     | 39.6              | 42   | 32.6                 |        | 119          | 29.3              | 17   | 23.0                 |       | 140     | 36.8              | 41   | 41.4                 |       | 119          | 30.2              | 17   | 19.8                 |       | 139     | 36.1              | 42   | 44.2                 |       | 122          | 30.1              | 14   | 18.7                 |       | 139     | 36.1 | 42    | 44.2 |       |
| No. of children, mean (SD)                  | 3.2          | 1.7               | 3.0  | 1.7                  | 0.428 | 3.0     | 1.9               | 2.7  | 1.7                  | 0.099  | 3.2          | 1.7               | 3.1  | 1.9                  | 0.859 | 3.0     | 1.9               | 2.6  | 1.7                  | 0.044 | 3.2          | 1.7               | 3.0  | 1.8                  | 0.394 | 3.0     | 1.8               | 2.8  | 1.9                  | 0.343 | 3.2          | 1.7               | 3.0  | 1.9                  | 0.438 | 2.9     | 1.9  | 2.8   | 1.8  | 0.607 |
| <b>Pregnancy intention</b>                  |              |                   |      |                      |       |         |                   |      |                      |        |              |                   |      |                      |       |         |                   |      |                      |       |              |                   |      |                      |       |         |                   |      |                      |       |              |                   |      |                      |       |         |      |       |      |       |
| No                                          | 81           | 21.15             | 19   | 19.6                 | 0.891 | 76      | 21.65             | 20   | 15.5                 | 0.195  | 83           | 20.4              | 17   | 23.0                 | 0.391 | 78      | 20.5              | 18   | 18.2                 | 0.126 | 84           | 21.3              | 16   | 18.6                 | 0.349 | 77      | 20.0              | 19   | 20.0                 | 0.190 | 88           | 21.7              | 12   | 16.0                 | 0.442 | 21      | 22.1 | 19.48 | 22.1 | 0.462 |
| Yes                                         | 271          | 70.76             | 71   | 73.2                 |       | 247     | 70.37             | 94   | 72.9                 |        | 288          | 70.9              | 54   | 73.0                 |       | 274     | 71.9              | 67   | 67.7                 |       | 276          | 70.1              | 66   | 76.7                 |       | 278     | 72.2              | 63   | 66.3                 |       | 284          | 70.1              | 58   | 77.3                 |       | 63      | 66.3 | 72.21 | 66.3 |       |
| Don't know                                  | 31           | 8.09              | 7    | 7.2                  |       | 28      | 7.98              | 15   | 11.6                 |        | 35           | 8.6               | 3    | 4.1                  |       | 29      | 7.6               | 14   | 14.1                 |       | 34           | 8.6               | 4    | 4.7                  |       | 33      | 8.2               | 5    | 6.7                  |       | 11           | 11.6              | 8.31 | 11.6                 |       |         |      |       |      |       |
| <b>Partner's pregnancy intention</b>        |              |                   |      |                      |       |         |                   |      |                      |        |              |                   |      |                      |       |         |                   |      |                      |       |              |                   |      |                      |       |         |                   |      |                      |       |              |                   |      |                      |       |         |      |       |      |       |
| No                                          | 57           | 14.88             | 12   | 12.4                 | 0.462 | 53      | 15.1              | 15   | 11.6                 | 0.293  | 55           | 13.6              | 14   | 18.9                 | 0.454 | 57      | 15.0              | 11   | 11.1                 | 0.541 | 58           | 14.7              | 11   | 12.8                 | 0.896 | 55      | 14.3              | 13   | 13.7                 | 0.833 | 61           | 15.1              | 8    | 10.7                 | 0.600 | 14      | 14.7 | 14.03 | 14.7 | 0.799 |
| Yes                                         | 259          | 67.62             | 63   | 65.0                 |       | 235     | 66.95             | 96   | 74.4                 |        | 276          | 68.0              | 46   | 62.2                 |       | 262     | 68.8              | 69   | 69.7                 |       | 263          | 66.8              | 59   | 68.6                 |       | 269     | 66.4              | 64   | 67.4                 |       | 269          | 66.4              | 53   | 70.7                 |       | 63      | 66.3 | 69.61 | 66.3 |       |
| Don't know                                  | 67           | 17.49             | 22   | 22.7                 |       | 63      | 17.95             | 18   | 14.0                 |        | 75           | 18.5              | 14   | 18.9                 |       | 62      | 16.3              | 19   | 19.2                 |       | 73           | 18.5              | 16   | 18.6                 |       | 63      | 16.4              | 18   | 19.0                 |       | 75           | 18.5              | 14   | 18.7                 |       | 18      | 19.0 | 16.36 | 19.0 |       |
| <b>History of unintended pregnancy</b>      |              |                   |      |                      |       |         |                   |      |                      |        |              |                   |      |                      |       |         |                   |      |                      |       |              |                   |      |                      |       |         |                   |      |                      |       |              |                   |      |                      |       |         |      |       |      |       |
| No                                          | 245          | 63.97             | 68   | 70.1                 | 0.257 | 248     | 70.66             | 87   | 67.4                 | 0.497  | 266          | 65.5              | 47   | 63.5                 | 0.739 | 265     | 69.6              | 70   | 70.7                 | 0.824 | 258          | 65.5              | 55   | 64.0                 | 0.787 | 265     | 68.8              | 70   | 73.7                 | 0.356 | 261          | 64.4              | 52   | 69.3                 | 0.414 | 69      | 72.6 | 69.09 | 72.6 | 0.501 |
| Yes                                         | 138          | 36.03             | 29   | 29.9                 |       | 103     | 29.34             | 42   | 32.6                 |        | 140          | 34.5              | 27   | 36.5                 |       | 116     | 30.5              | 29   | 29.3                 |       | 136          | 34.5              | 31   | 36.1                 |       | 120     | 31.2              | 25   | 26.3                 |       | 144          | 35.6              | 23   | 30.7                 |       | 26      | 27.4 | 30.91 | 27.4 |       |
| <b>Multiple sex partners</b>                |              |                   |      |                      |       |         |                   |      |                      |        |              |                   |      |                      |       |         |                   |      |                      |       |              |                   |      |                      |       |         |                   |      |                      |       |              |                   |      |                      |       |         |      |       |      |       |
| No                                          | 360          | 93.99             | 92   | 94.9                 | 0.750 | 333     | 94.87             | 123  | 95.4                 | 0.832  | 382          | 94.1              | 70   | 89.2                 | 0.864 | 361     | 94.8              | 95   | 96.0                 | 0.623 | 371          | 94.2              | 81   | 94.2                 | 0.993 | 365     | 94.8              | 91   | 95.8                 | 0.693 | 380          | 93.8              | 72   | 96.0                 | 0.461 | 91      | 95.8 | 94.81 | 95.8 | 0.693 |
| Yes                                         | 23           | 6.01              | 5    | 5.2                  |       | 18      | 5.13              | 6    | 4.7                  |        | 24           | 5.9               | 4    | 10.8                 |       | 20      | 5.3               | 4    | 4.0                  |       | 23           | 5.8               | 5    | 5.8                  |       | 20      | 5.2               | 4    | 4.2                  |       | 25           | 6.2               | 3    | 4.0                  |       | 4       | 4.2  | 5.19  | 4.2  |       |
| <b>2) HIV-related characteristics</b>       |              |                   |      |                      |       |         |                   |      |                      |        |              |                   |      |                      |       |         |                   |      |                      |       |              |                   |      |                      |       |         |                   |      |                      |       |              |                   |      |                      |       |         |      |       |      |       |
| <b>HIV status</b>                           |              |                   |      |                      |       |         |                   |      |                      |        |              |                   |      |                      |       |         |                   |      |                      |       |              |                   |      |                      |       |         |                   |      |                      |       |              |                   |      |                      |       |         |      |       |      |       |
| Negative                                    | 351          | 91.64             | 87   | 89.7                 | 0.543 | 123     | 89.17             | 313  | 95.4                 | 0.038  | 372          | 91.6              | 66   | 89.7                 | 0.495 | 343     | 90.0              | 93   | 93.9                 | 0.229 | 359          | 91.1              | 79   | 91.9                 | 0.825 | 347     | 90.1              | 89   | 93.7                 | 0.282 | 372          | 91.9              | 66   | 88.0                 | 0.278 | 347     | 90.1 | 89    | 93.7 | 0.282 |
| Positive                                    | 32           | 8.36              | 10   | 10.3                 |       | 6       | 10.83             | 38   | 4.7                  |        | 34           | 8.4               | 8    | 10.3                 |       | 38      | 10.0              | 6    | 6.1                  |       | 35           | 8.9               | 7    | 8.1                  |       | 38      | 9.9               | 6    | 6.3                  |       | 33           | 8.2               | 9    | 12.0                 |       | 38      | 9.9  | 6     | 6.3  |       |
| <b>Partner's HIV status</b>                 |              |                   |      |                      |       |         |                   |      |                      |        |              |                   |      |                      |       |         |                   |      |                      |       |              |                   |      |                      |       |         |                   |      |                      |       |              |                   |      |                      |       |         |      |       |      |       |
| Negative                                    | 308          | 80.42             | 78   | 80.4                 | 0.834 | 107     | 75.78             | 266  | 83.0                 | 0.163  | 326          | 80.3              | 60   | 81.1                 | 0.509 | 289     | 75.9              | 84   | 84.9                 | 0.122 | 313          | 79.4              | 73   | 84.9                 | 0.225 | 295     | 76.6              | 78   | 82.1                 | 0.431 | 324          | 80.0              | 62   | 82.7                 | 0.646 | 295     | 76.6 | 78    | 82.1 | 0.431 |
| Positive                                    | 26           | 6.79              | 8    | 8.3                  |       | 6       | 9.4               | 33   | 4.7                  |        | 27           | 6.7               | 7    | 9.5                  |       | 29      | 7.5               | 4    | 4.0                  |       | 27           | 6.9               | 7    | 8.1                  |       | 34      | 8.8               | 5    | 5.3                  |       | 28           | 6.9               | 6    | 8.0                  |       | 34      | 8.8  | 5     | 5.3  |       |
| Don't know                                  | 49           | 12.79             | 11   | 11.3                 |       | 16      | 14.81             | 52   | 12.4                 |        | 53           | 13.1              | 7    | 9.5                  |       | 57      | 15.0              | 11   | 11.1                 |       | 54           | 13.7              | 6    | 7.0                  |       | 56      | 14.6              | 12   | 12.6                 |       | 53           | 13.1              | 7    | 9.3                  |       | 56      | 14.6 | 12    | 12.6 |       |
| <b>Disclosure of HIV status</b>             |              |                   |      |                      |       |         |                   |      |                      |        |              |                   |      |                      |       |         |                   |      |                      |       |              |                   |      |                      |       |         |                   |      |                      |       |              |                   |      |                      |       |         |      |       |      |       |
| No                                          | 18           | 4.7               | 3    | 3.1                  | 0.489 | 4       | 4.27              | 15   | 3.1                  | 0.559  | 19           | 4.7               | 2    | 2.7                  | 0.444 | 17      | 4.5               | 2    | 2.0                  | 0.267 | 18           | 4.6               | 3    | 3.5                  | 0.657 | 16      | 4.2               | 3    | 3.2                  | 0.655 | 20           | 4.9               | 1    | 1.3                  | 0.161 | 15      | 3.9  | 4     | 4.2  | 0.888 |
| Yes                                         | 365          | 95.3              | 94   | 96.9                 |       | 125     | 95.73             | 336  | 96.9                 |        | 387          | 95.3              | 72   | 97.3                 |       | 364     | 95.5              | 97   | 98.0                 |       | 376          | 95.4              | 83   | 96.5                 |       | 369     | 95.8              | 92   | 96.8                 |       | 385          | 95.1              | 74   | 98.7                 |       | 370     | 96.1 | 91    | 95.8 |       |
| <b>Perceived risk for HIV/STIs</b>          |              |                   |      |                      |       |         |                   |      |                      |        |              |                   |      |                      |       |         |                   |      |                      |       |              |                   |      |                      |       |         |                   |      |                      |       |              |                   |      |                      |       |         |      |       |      |       |
| No risk at all                              | 47           | 12.27             | 15   | 15.5                 | 0.748 | 20      | 19.09             | 67   | 15.5                 | 0.789  | 47           | 11.6              | 15   | 20.3                 | 0.193 | 71      | 18.6              | 16   | 16.2                 | 0.922 | 43           | 10.9              | 19   | 22.1                 | 0.044 | 70      | 18.2              | 17   | 17.9                 | 0.949 | 48           | 11.9              | 14   | 18.7                 | 0.395 | 70      | 18.2 | 17    | 17.9 | 0.999 |
| Small                                       | 140          | 36.55             | 37   | 38.1                 |       | 48      | 37.04             | 130  | 37.2                 |        | 154          | 37.9              | 23   | 31.1                 |       | 148     | 37.3              | 36   | 36.4                 |       | 148          | 37.6              | 29   | 33.7                 |       | 145     | 37.7              | 33   | 34.7                 |       | 149          | 36.8              | 28   | 37.3                 |       | 143     | 37.1 | 35    | 36.8 |       |
| Moderate                                    | 112          | 29.24             | 24   | 24.7                 |       | 34      | 25.64             | 90   | 26.4                 |        | 117          | 28.8              | 19   | 25.7                 |       | 97      | 25.5              | 27   | 27.3                 |       | 116          | 29.4              | 20   | 23.3                 |       | 98      | 25.5              | 26   | 27.4                 |       | 117          | 28.9              | 19   | 25.3                 |       | 99      | 25.7 | 25    | 26.3 |       |
| Great                                       | 84           | 21.93             | 21   | 21.7                 |       | 27      | 18.23             | 64   | 20.9                 |        | 88           | 21.7              | 17   | 23.0                 |       | 71      | 18.6              | 20   | 20.2                 |       | 87           | 22.1              | 18   | 20.9                 |       | 72      | 18.7              | 19   | 20.0                 |       | 91           | 22.5              | 14   | 18.7                 |       | 73      | 19.0 | 18    | 19.0 |       |
| <b>3) HEC use</b>                           |              |                   |      |                      |       |         |                   |      |                      |        |              |                   |      |                      |       |         |                   |      |                      |       |              |                   |      |                      |       |         |                   |      |                      |       |              |                   |      |                      |       |         |      |       |      |       |
| <b>Type of HECs</b>                         |              |                   |      |                      |       |         |                   |      |                      |        |              |                   |      |                      |       |         |                   |      |                      |       |              |                   |      |                      |       |         |                   |      |                      |       |              |                   |      |                      |       |         |      |       |      |       |
| Injectables                                 | 198          | 51.7              | 54   | 55.7                 | 0.901 | 178     | 50.71             | 68   | 52.7                 | 0.910  | 207          | 51.0              | 45   | 60.8                 | 0.478 | 190     | 49.9              | 56   | 56.6                 | 0.673 | 193          | 49.0              | 59   | 68.6                 | 0.010 | 190     | 49.4              | 56   | 59.0                 | 0.    |              |                   |      |                      |       |         |      |       |      |       |
