# Supplementary material for: Positive deviance for promoting dual-method contraceptive use among women in Uganda: a cluster randomized controlled trial
Source: bioRxiv or medRxiv preprint supplement (doi:10.1101/2020.10.03.20206169), 2020-10-06
Supplement: Supplementary file [file media-3.pdf]

**Supplementary Table S3. Effects of intervention on dual-method use at last sexual intercourse among women at 2 months after enrollement**

| Variables                                    | Model 1                |          |         | Model 2                |          |         | Model 3              |                 |              |
|----------------------------------------------|------------------------|----------|---------|------------------------|----------|---------|----------------------|-----------------|--------------|
|                                              | OR                     | (95% CI) | p-value | AOR <sup>a</sup>       | (95% CI) | p-value | AOR <sup>b</sup>     | (95% CI)        | p-value      |
| <b>Intervention</b>                          |                        |          |         |                        |          |         |                      |                 |              |
| Control                                      | Ref.                   |          |         | Ref.                   |          |         | Ref.                 |                 |              |
| Intervention                                 | 4.62 ( 3.18 - 6.7125 ) |          | <0.001  | 1.17 ( 0.46 - 2.9811 ) |          | 0.745   | 1.19 ( 0.48 - 2.95 ) |                 | 0.712        |
| <b>Time</b>                                  |                        |          |         | 2.76 ( 1.63 - 4.6676 ) |          | <0.001  | 2.89 ( 1.70 - 4.89 ) |                 | 1.712        |
| <b>Intervention*time<sup>c</sup></b>         |                        |          |         | 4.29 ( 2.12 - 8.69 )   |          | <0.001  | 4.12 ( 2.02 - 8.39 ) |                 | <0.001       |
| <b>1) Socio-demographic characteristics</b>  |                        |          |         |                        |          |         |                      |                 |              |
| <b>Age in years</b>                          |                        |          |         |                        |          |         | 1.00 ( 0.96 - 1.04 ) |                 | 0.712        |
| <b>Education</b>                             |                        |          |         |                        |          |         |                      |                 |              |
| Never                                        |                        |          |         |                        |          |         | Ref.                 |                 |              |
| Primary and more                             |                        |          |         |                        |          |         | 0.98 ( 0.66 - 1.47 ) |                 | 0.935        |
| <b>Religion</b>                              |                        |          |         |                        |          |         |                      |                 |              |
| Christian                                    |                        |          |         |                        |          |         | Ref.                 |                 |              |
| Muslim                                       |                        |          |         |                        |          |         | 1.42 ( 0.78 - 2.58 ) |                 | 0.246        |
| <b>Wealth index</b>                          |                        |          |         |                        |          |         |                      |                 |              |
| Poor                                         |                        |          |         |                        |          |         | Ref.                 |                 |              |
| Middle                                       |                        |          |         |                        |          |         | 1.35 ( 0.89 - 2.05 ) |                 | 0.164        |
| Rich                                         |                        |          |         |                        |          |         | 1.31 ( 0.84 - 2.05 ) |                 | 0.24         |
| <b>No. of children</b>                       |                        |          |         |                        |          |         | 0.87 ( 0.75 - 1.00 ) |                 | 0.057        |
| <b>Pregnancy intention</b>                   |                        |          |         |                        |          |         |                      |                 |              |
| No                                           |                        |          |         |                        |          |         | Ref.                 |                 |              |
| Yes                                          |                        |          |         |                        |          |         | 1.17 ( 0.66 - 2.09 ) |                 | 0.592        |
| Don't know                                   |                        |          |         |                        |          |         | 1.54 ( 0.71 - 3.34 ) |                 | 0.274        |
| <b>Partner's pregnancy intention</b>         |                        |          |         |                        |          |         |                      |                 |              |
| No                                           |                        |          |         |                        |          |         | Ref.                 |                 |              |
| Yes                                          |                        |          |         |                        |          |         | 0.45 ( 0.24 - 0.85 ) |                 | <b>0.013</b> |
| Don't know                                   |                        |          |         |                        |          |         | 0.49 ( 0.25 - 0.96 ) |                 | <b>0.038</b> |
| <b>History of unintended pregnancy</b>       |                        |          |         |                        |          |         |                      |                 |              |
| No                                           |                        |          |         |                        |          |         | Ref.                 |                 |              |
| Yes                                          |                        |          |         |                        |          |         | 0.93 ( 0.64 - 1.34 ) |                 | 0.68         |
| <b>Multiple sex partners</b>                 |                        |          |         |                        |          |         |                      |                 |              |
| No                                           |                        |          |         |                        |          |         | Ref.                 |                 |              |
| Yes                                          |                        |          |         |                        |          |         | 3.50 ( 1.85 - 6.62 ) |                 | <0.001       |
| <b>2) HIV-related characteristics</b>        |                        |          |         |                        |          |         |                      |                 |              |
| <b>HIV status</b>                            |                        |          |         |                        |          |         |                      |                 |              |
| Negative                                     |                        |          |         |                        |          |         | Ref.                 |                 |              |
| Positive                                     |                        |          |         |                        |          |         | 1.57 ( 0.71 - 3.49 ) |                 | 0.267        |
| <b>Partner's HIV status</b>                  |                        |          |         |                        |          |         |                      |                 |              |
| Negative                                     |                        |          |         |                        |          |         | Ref.                 |                 |              |
| Positive                                     |                        |          |         |                        |          |         | 1.27 ( 0.54 - 2.99 ) |                 | 0.583        |
| Don't know                                   |                        |          |         |                        |          |         | 0.95 ( 0.57 - 1.58 ) |                 | 0.837        |
| <b>Perceived risk for HIV/STIs</b>           |                        |          |         |                        |          |         |                      |                 |              |
| No risk at all                               |                        |          |         |                        |          |         | Ref.                 |                 |              |
| Small                                        |                        |          |         |                        |          |         | 0.80 ( 0.47 - 1.37 ) |                 | 0.421        |
| Moderate                                     |                        |          |         |                        |          |         | 1.05 ( 0.60 - 1.83 ) |                 | 0.858        |
| Great                                        |                        |          |         |                        |          |         | 1.18 ( 0.65 - 2.15 ) |                 | 0.588        |
| <b>3) HEC use</b>                            |                        |          |         |                        |          |         |                      |                 |              |
| <b>Type of HECs</b>                          |                        |          |         |                        |          |         |                      |                 |              |
| Injectables                                  |                        |          |         |                        |          |         | Ref.                 |                 |              |
| Implants                                     |                        |          |         |                        |          |         | 0.94 ( 0.65 - 1.35 ) |                 | 0.726        |
| IUD                                          |                        |          |         |                        |          |         | 1.21 ( 0.69 - 2.12 ) |                 | 0.505        |
| Pill                                         |                        |          |         |                        |          |         | 0.83 ( 0.40 - 1.72 ) |                 | 0.611        |
| Female sterilization                         |                        |          |         |                        |          |         |                      | perfect success |              |
| <b>4) Other psychosocial characteristics</b> |                        |          |         |                        |          |         |                      |                 |              |
| <b>HIV-related knowledge (HIV-KQ-18)</b>     |                        |          |         |                        |          |         | 1.03 ( 0.97 - 1.11 ) |                 | 0.338        |
| <b>Condom use self-efficacy scale</b>        |                        |          |         |                        |          |         | 1.02 ( 1.00 - 1.05 ) |                 | <b>0.035</b> |
| <b>Sexual Relationship Power Scale</b>       |                        |          |         |                        |          |         |                      |                 |              |
| Low                                          |                        |          |         |                        |          |         | Ref.                 |                 |              |
| Medium                                       |                        |          |         |                        |          |         | 1.13 ( 0.76 - 1.69 ) |                 | 0.551        |
| High                                         |                        |          |         |                        |          |         | 1.07 ( 0.70 - 1.66 ) |                 | 0.748        |

OR: odds ratio; AOR: adjusted odds ratio; SD: standard deviation; HIV: human immunodeficiency virus; STI: sexually transmitted infection; HEC: highly effective contraceptive; IUD: intrauterine device

a. Adjusted for the cluster effect

b. Adjusted for age, education, religion, wealth index, number of children, pregnancy intention, partner's pregnancy intention, history of unintended pregnancy, multiple sex partnership, HIV status, partner's HIV status, risk perception of HIV/STIs, HIV-related knowledge, condom use self-efficacy, and sexual relationship control power.

c. Intervention\*time represents the status of the intervention group at follow-up in comparison with the control group at the baseline.

**Supplementary Table S4. Effects of intervention on dual-method use at last sexual intercourse among women at 4 months after enrollement**

| Variables                                    | Model 1                |          |         | Model 2                |          |         | Model 3                   |          |              |
|----------------------------------------------|------------------------|----------|---------|------------------------|----------|---------|---------------------------|----------|--------------|
|                                              | OR                     | (95% CI) | p-value | AOR <sup>a</sup>       | (95% CI) | p-value | AOR <sup>b</sup>          | (95% CI) | p-value      |
| <b>Intervention</b>                          |                        |          |         |                        |          |         |                           |          |              |
| Control                                      | Ref.                   |          |         | Ref.                   |          |         | Ref.                      |          |              |
| Intervention                                 | 2.13 ( 1.49 - 3.0643 ) |          | <0.001  | 1.62 ( 0.81 - 3.2637 ) |          | 0.176   | 1.66 ( 0.87 - 3.16 )      |          | 0.121        |
| <b>Time</b>                                  |                        |          |         | 3.55 ( 2.07 - 6.0778 ) |          | <0.001  | 3.55 ( 2.08 - 6.08 )      |          | <0.001       |
| <b>Intervention*time<sup>c</sup></b>         |                        |          |         | 1.66 ( 0.84 - 3.30 )   |          | 0.148   | 1.66 ( 0.84 - 3.30 )      |          | 0.146        |
| <b>1) Socio-demographic characteristics</b>  |                        |          |         |                        |          |         |                           |          |              |
| <b>Age in years</b>                          |                        |          |         |                        |          |         | 0.99 ( 0.95 - 1.03 )      |          | 0.530        |
| <b>Education</b>                             |                        |          |         |                        |          |         | Ref.                      |          |              |
| Never                                        |                        |          |         |                        |          |         | Ref.                      |          |              |
| Primary and more                             |                        |          |         |                        |          |         | 0.79 ( 0.51 - 1.22 )      |          | 0.278        |
| <b>Religion</b>                              |                        |          |         |                        |          |         | Ref.                      |          |              |
| Christian                                    |                        |          |         |                        |          |         | Ref.                      |          |              |
| Muslim                                       |                        |          |         |                        |          |         | 1.28 ( 0.66 - 2.49 )      |          | 0.465        |
| <b>Wealth index</b>                          |                        |          |         |                        |          |         | Ref.                      |          |              |
| Poor                                         |                        |          |         |                        |          |         | Ref.                      |          |              |
| Middle                                       |                        |          |         |                        |          |         | 1.12 ( 0.71 - 1.76 )      |          | 0.624        |
| Rich                                         |                        |          |         |                        |          |         | 1.14 ( 0.70 - 1.85 )      |          | 0.608        |
| <b>No. of children</b>                       |                        |          |         |                        |          |         | 0.92 ( 0.78 - 1.08 )      |          | 0.314        |
| <b>Pregnancy intention</b>                   |                        |          |         |                        |          |         | Ref.                      |          |              |
| No                                           |                        |          |         |                        |          |         | Ref.                      |          |              |
| Yes                                          |                        |          |         |                        |          |         | 0.75 ( 0.40 - 1.42 )      |          | 0.376        |
| Don't know                                   |                        |          |         |                        |          |         | 1.17 ( 0.51 - 2.66 )      |          | 0.715        |
| <b>Partner's pregnancy intention</b>         |                        |          |         |                        |          |         | Ref.                      |          |              |
| No                                           |                        |          |         |                        |          |         | Ref.                      |          |              |
| Yes                                          |                        |          |         |                        |          |         | 0.55 ( 0.28 - 1.09 )      |          | 0.085        |
| Don't know                                   |                        |          |         |                        |          |         | 0.55 ( 0.26 - 1.15 )      |          | 0.113        |
| <b>History of unintended pregnancy</b>       |                        |          |         |                        |          |         | Ref.                      |          |              |
| No                                           |                        |          |         |                        |          |         | Ref.                      |          |              |
| Yes                                          |                        |          |         |                        |          |         | 0.62 ( 0.40 - 0.94 )      |          | 0.026        |
| <b>Multiple sex partners</b>                 |                        |          |         |                        |          |         | Ref.                      |          |              |
| No                                           |                        |          |         |                        |          |         | Ref.                      |          |              |
| Yes                                          |                        |          |         |                        |          |         | 2.87 ( 1.45 - 5.67 )      |          | <b>0.002</b> |
| <b>2) HIV-related characteristics</b>        |                        |          |         |                        |          |         |                           |          |              |
| <b>HIV status</b>                            |                        |          |         |                        |          |         | Ref.                      |          |              |
| Negative                                     |                        |          |         |                        |          |         | Ref.                      |          |              |
| Positive                                     |                        |          |         |                        |          |         | 1.61 ( 0.69 - 3.80 )      |          | 0.273        |
| <b>Partner's HIV status</b>                  |                        |          |         |                        |          |         | Ref.                      |          |              |
| Negative                                     |                        |          |         |                        |          |         | Ref.                      |          |              |
| Positive                                     |                        |          |         |                        |          |         | 1.40 ( 0.55 - 3.52 )      |          | 0.48         |
| Don't know                                   |                        |          |         |                        |          |         | 1.26 ( 0.74 - 2.15 )      |          | 0.389        |
| <b>Perceived risk for HIV/STIs</b>           |                        |          |         |                        |          |         | Ref.                      |          |              |
| No risk at all                               |                        |          |         |                        |          |         | Ref.                      |          |              |
| Small                                        |                        |          |         |                        |          |         | 0.84 ( 0.47 - 1.49 )      |          | 0.544        |
| Moderate                                     |                        |          |         |                        |          |         | 1.01 ( 0.56 - 1.83 )      |          | 0.975        |
| Great                                        |                        |          |         |                        |          |         | 0.96 ( 0.50 - 1.84 )      |          | 0.894        |
| <b>3) HEC use</b>                            |                        |          |         |                        |          |         |                           |          |              |
| <b>Type of HECs</b>                          |                        |          |         |                        |          |         | Ref.                      |          |              |
| Injectables                                  |                        |          |         |                        |          |         | Ref.                      |          |              |
| Implants                                     |                        |          |         |                        |          |         | 0.94 ( 0.62 - 1.44 )      |          | 0.788        |
| IUD                                          |                        |          |         |                        |          |         | 1.18 ( 0.63 - 2.21 )      |          | 0.603        |
| Pill                                         |                        |          |         |                        |          |         | 2.35 ( 1.17 - 4.74 )      |          | 0.017        |
| Female sterilization                         |                        |          |         |                        |          |         | 0.974144 ( 0.05 - 19.29 ) |          | 0.99         |
| <b>4) Other psychosocial characteristics</b> |                        |          |         |                        |          |         |                           |          |              |
| <b>HIV-related knowledge (HIV-KQ-18)</b>     |                        |          |         |                        |          |         | 1.01 ( 0.94 - 1.08 )      |          | 0.858        |
| <b>Condom use self-efficacy scale</b>        |                        |          |         |                        |          |         | 1.04 ( 1.01 - 1.06 )      |          | <b>0.002</b> |
| <b>Sexual Relationship Power Scale</b>       |                        |          |         |                        |          |         | Ref.                      |          |              |
| Low                                          |                        |          |         |                        |          |         | Ref.                      |          |              |
| Medium                                       |                        |          |         |                        |          |         | 1.44 ( 0.91 - 2.27 )      |          | 0.119        |
| High                                         |                        |          |         |                        |          |         | 1.21 ( 0.74 - 1.98 )      |          | 0.443        |

OR: odds ratio; AOR: adjusted odds ratio; SD: standard deviation; HIV: human immunodeficiency virus; STI: sexually transmitted infection; HEC: highly effective contraceptive; IUD: intrauterine device

a. Adjusted for the cluster effect

b. Adjusted for age, education, religion, wealth index, number of children, pregnancy intention, partner's pregnancy intention, history of unintended pregnancy, multiple sex partnership, HIV status, partner's HIV status, risk perception of HIV/STIs, HIV-related knowledge, condom use self-efficacy, and sexual relationship control power.

c. Intervention\*time represents the status of the intervention group at follow-up in comparison with the control group at the baseline.

**Supplementary Table S5. Effects of intervention on dual-method use at last sexual intercourse among women at 6 months after enrollement**

| Variables                                    | Model 1                |          |         | Model 2                |          |              | Model 3              |                 |              |
|----------------------------------------------|------------------------|----------|---------|------------------------|----------|--------------|----------------------|-----------------|--------------|
|                                              | OR                     | (95% CI) | p-value | AOR <sup>a</sup>       | (95% CI) | p-value      | AOR <sup>b</sup>     | (95% CI)        | p-value      |
| <b>Intervention</b>                          |                        |          |         |                        |          |              |                      |                 |              |
| Control                                      | Ref.                   |          |         | Ref.                   |          |              | Ref.                 |                 |              |
| Intervention                                 | 2.53 ( 1.69 - 3.7922 ) |          | <0.001  | 1.42 ( 0.55 - 3.6676 ) |          | 0.465        | 1.40 ( 0.53 - 3.67 ) |                 | 0.494        |
| <b>Time</b>                                  |                        |          |         | 2.16 ( 1.24 - 3.7523 ) |          | <b>0.006</b> | 2.17 ( 1.25 - 3.76 ) |                 | <b>0.006</b> |
| <b>Intervention*time<sup>c</sup></b>         |                        |          |         | 2.04 ( 1.00 - 4.17 )   |          | 0.051        | 2.03 ( 0.99 - 4.14 ) |                 | 0.052        |
| <b>1) Socio-demographic characteristics</b>  |                        |          |         |                        |          |              |                      |                 |              |
| <b>Age in years</b>                          |                        |          |         |                        |          |              | 0.97 ( 0.93 - 1.02 ) |                 | 0.208        |
| <b>Education</b>                             |                        |          |         |                        |          |              |                      |                 |              |
| Never                                        |                        |          |         |                        |          |              | Ref.                 |                 |              |
| Primary and more                             |                        |          |         |                        |          |              | 0.89 ( 0.56 - 1.41 ) |                 | 0.618        |
| <b>Religion</b>                              |                        |          |         |                        |          |              |                      |                 |              |
| Christian                                    |                        |          |         |                        |          |              | Ref.                 |                 |              |
| Muslim                                       |                        |          |         |                        |          |              | 1.36 ( 0.70 - 2.65 ) |                 | 0.366        |
| <b>Wealth index</b>                          |                        |          |         |                        |          |              |                      |                 |              |
| Poor                                         |                        |          |         |                        |          |              | Ref.                 |                 |              |
| Middle                                       |                        |          |         |                        |          |              | 0.96 ( 0.60 - 1.55 ) |                 | 0.875        |
| Rich                                         |                        |          |         |                        |          |              | 0.75 ( 0.45 - 1.27 ) |                 | 0.283        |
| <b>No. of children</b>                       |                        |          |         |                        |          |              | 1.02 ( 0.86 - 1.20 ) |                 | 0.853        |
| <b>Pregnancy intention</b>                   |                        |          |         |                        |          |              |                      |                 |              |
| No                                           |                        |          |         |                        |          |              | Ref.                 |                 |              |
| Yes                                          |                        |          |         |                        |          |              | 0.84 ( 0.44 - 1.61 ) |                 | 0.602        |
| Don't know                                   |                        |          |         |                        |          |              | 1.29 ( 0.55 - 3.03 ) |                 | 0.565        |
| <b>Partner's pregnancy intention</b>         |                        |          |         |                        |          |              |                      |                 |              |
| No                                           |                        |          |         |                        |          |              | Ref.                 |                 |              |
| Yes                                          |                        |          |         |                        |          |              | 0.69 ( 0.34 - 1.41 ) |                 | 0.307        |
| Don't know                                   |                        |          |         |                        |          |              | 0.62 ( 0.29 - 1.35 ) |                 | 0.228        |
| <b>History of unintended pregnancy</b>       |                        |          |         |                        |          |              |                      |                 |              |
| No                                           |                        |          |         |                        |          |              | Ref.                 |                 |              |
| Yes                                          |                        |          |         |                        |          |              | 0.73 ( 0.48 - 1.13 ) |                 | 0.157        |
| <b>Multiple sex partners</b>                 |                        |          |         |                        |          |              |                      |                 |              |
| No                                           |                        |          |         |                        |          |              | Ref.                 |                 |              |
| Yes                                          |                        |          |         |                        |          |              | 2.96 ( 1.50 - 5.85 ) |                 | <b>0.002</b> |
| <b>2) HIV-related characteristics</b>        |                        |          |         |                        |          |              |                      |                 |              |
| <b>HIV status</b>                            |                        |          |         |                        |          |              |                      |                 |              |
| Negative                                     |                        |          |         |                        |          |              | Ref.                 |                 |              |
| Positive                                     |                        |          |         |                        |          |              | 1.24 ( 0.52 - 2.97 ) |                 | 0.629        |
| <b>Partner's HIV status</b>                  |                        |          |         |                        |          |              |                      |                 |              |
| Negative                                     |                        |          |         |                        |          |              | Ref.                 |                 |              |
| Positive                                     |                        |          |         |                        |          |              | 1.67 ( 0.64 - 4.31 ) |                 | 0.292        |
| Don't know                                   |                        |          |         |                        |          |              | 1.09 ( 0.62 - 1.92 ) |                 | 0.758        |
| <b>Perceived risk for HIV/STIs</b>           |                        |          |         |                        |          |              |                      |                 |              |
| No risk at all                               |                        |          |         |                        |          |              | Ref.                 |                 |              |
| Small                                        |                        |          |         |                        |          |              | 0.76 ( 0.41 - 1.40 ) |                 | 0.377        |
| Moderate                                     |                        |          |         |                        |          |              | 1.03 ( 0.55 - 1.92 ) |                 | 0.937        |
| Great                                        |                        |          |         |                        |          |              | 0.77 ( 0.38 - 1.53 ) |                 | 0.452        |
| <b>3) HEC use</b>                            |                        |          |         |                        |          |              |                      |                 |              |
| <b>Type of HECs</b>                          |                        |          |         |                        |          |              |                      |                 |              |
| Injectables                                  |                        |          |         |                        |          |              | Ref.                 |                 |              |
| Implants                                     |                        |          |         |                        |          |              | 0.92 ( 0.60 - 1.42 ) |                 | 0.715        |
| IUD                                          |                        |          |         |                        |          |              | 1.19 ( 0.63 - 2.25 ) |                 | 0.589        |
| Pill                                         |                        |          |         |                        |          |              | 2.03 ( 0.99 - 4.17 ) |                 | 0.054        |
| Female sterilization                         |                        |          |         |                        |          |              |                      | perfect success |              |
| <b>4) Other psychosocial characteristics</b> |                        |          |         |                        |          |              |                      |                 |              |
| <b>HIV-related knowledge (HIV-KQ-18)</b>     |                        |          |         |                        |          |              | 1.05 ( 0.97 - 1.13 ) |                 | 0.226        |
| <b>Condom use self-efficacy scale</b>        |                        |          |         |                        |          |              | 1.04 ( 1.01 - 1.06 ) |                 | <b>0.006</b> |
| <b>Sexual Relationship Power Scale</b>       |                        |          |         |                        |          |              |                      |                 |              |
| Low                                          |                        |          |         |                        |          |              | Ref.                 |                 |              |
| Medium                                       |                        |          |         |                        |          |              | 1.59 ( 0.99 - 2.54 ) |                 | 0.056        |
| High                                         |                        |          |         |                        |          |              | 1.19 ( 0.71 - 1.97 ) |                 | 0.513        |

OR: odds ratio; AOR: adjusted odds ratio; SD: standard deviation; HIV: human immunodeficiency virus; STI: sexually transmitted infection; HEC: highly effective contraceptive; IUD: intrauterine device

a. Adjusted for the cluster effect

b. Adjusted for age, education, religion, wealth index, number of children, pregnancy intention, partner's pregnancy intention, history of unintended pregnancy, multiple sex partnership, HIV status, partner's HIV status, risk perception of HIV/STIs, HIV-related knowledge, condom use self-efficacy, and sexual relationship control power.

c. Intervention\*time represents the status of the intervention group at follow-up in comparison with the control group at the baseline.

**Supplementary Table S6. Effects of intervention on dual-method use at last sexual intercourse among women at 8 months after enrollement**

| Variables                                    | Model 1                |          |                  | Model 2              |          |              | Model 3              |                 |                  |
|----------------------------------------------|------------------------|----------|------------------|----------------------|----------|--------------|----------------------|-----------------|------------------|
|                                              | OR                     | (95% CI) | p-value          | AOR <sup>a</sup>     | (95% CI) | p-value      | AOR <sup>b</sup>     | (95% CI)        | p-value          |
| <b>Intervention</b>                          |                        |          |                  |                      |          |              |                      |                 |                  |
| Control                                      | Ref.                   |          |                  | Ref.                 |          |              | Ref.                 |                 |                  |
| Intervention                                 | 2.76 ( 1.79 - 4.2587 ) |          | <b>&lt;0.001</b> | 1.41 ( 0.58 - 3.40 ) |          | 0.450        | 1.39 ( 0.59 - 3.31 ) |                 | 0.452            |
| <b>Time</b>                                  |                        |          |                  | 1.59 ( 0.91 - 2.76 ) |          | 0.101        | 1.60 ( 0.92 - 2.77 ) |                 | 0.094            |
| <b>Intervention*time<sup>c</sup></b>         |                        |          |                  | 2.19 ( 1.07 - 4.48 ) |          | <b>0.032</b> | 2.16 ( 1.06 - 4.41 ) |                 | <b>0.034</b>     |
| <b>1) Socio-demographic characteristics</b>  |                        |          |                  |                      |          |              |                      |                 |                  |
| <b>Age in years</b>                          |                        |          |                  |                      |          |              | 0.97 ( 0.93 - 1.01 ) |                 | 0.114            |
| <b>Education</b>                             |                        |          |                  |                      |          |              | Ref.                 |                 |                  |
| Never                                        |                        |          |                  |                      |          |              | Ref.                 |                 |                  |
| Primary and more                             |                        |          |                  |                      |          |              | 1.03 ( 0.66 - 1.62 ) |                 | 0.884            |
| <b>Religion</b>                              |                        |          |                  |                      |          |              | Ref.                 |                 |                  |
| Christian                                    |                        |          |                  |                      |          |              | Ref.                 |                 |                  |
| Muslim                                       |                        |          |                  |                      |          |              | 1.13 ( 0.57 - 2.21 ) |                 | 0.728            |
| <b>Wealth index</b>                          |                        |          |                  |                      |          |              | Ref.                 |                 |                  |
| Poor                                         |                        |          |                  |                      |          |              | Ref.                 |                 |                  |
| Middle                                       |                        |          |                  |                      |          |              | 1.11 ( 0.71 - 1.75 ) |                 | 0.647            |
| Rich                                         |                        |          |                  |                      |          |              | 0.89 ( 0.54 - 1.48 ) |                 | 0.664            |
| <b>No. of children</b>                       |                        |          |                  |                      |          |              | 1.04 ( 0.88 - 1.22 ) |                 | 0.676            |
| <b>Pregnancy intention</b>                   |                        |          |                  |                      |          |              | Ref.                 |                 |                  |
| No                                           |                        |          |                  |                      |          |              | Ref.                 |                 |                  |
| Yes                                          |                        |          |                  |                      |          |              | 0.82 ( 0.44 - 1.55 ) |                 | 0.550            |
| Don't know                                   |                        |          |                  |                      |          |              | 1.66 ( 0.75 - 3.65 ) |                 | 0.210            |
| <b>Partner's pregnancy intention</b>         |                        |          |                  |                      |          |              | Ref.                 |                 |                  |
| No                                           |                        |          |                  |                      |          |              | Ref.                 |                 |                  |
| Yes                                          |                        |          |                  |                      |          |              | 0.65 ( 0.33 - 1.28 ) |                 | 0.214            |
| Don't know                                   |                        |          |                  |                      |          |              | 0.71 ( 0.35 - 1.47 ) |                 | 0.359            |
| <b>History of unintended pregnancy</b>       |                        |          |                  |                      |          |              | Ref.                 |                 |                  |
| No                                           |                        |          |                  |                      |          |              | Ref.                 |                 |                  |
| Yes                                          |                        |          |                  |                      |          |              | 0.83 ( 0.55 - 1.25 ) |                 | 0.375            |
| <b>Multiple sex partners</b>                 |                        |          |                  |                      |          |              | Ref.                 |                 |                  |
| No                                           |                        |          |                  |                      |          |              | Ref.                 |                 |                  |
| Yes                                          |                        |          |                  |                      |          |              | 3.22 ( 1.69 - 6.12 ) |                 | <b>&lt;0.001</b> |
| <b>2) HIV-related characteristics</b>        |                        |          |                  |                      |          |              |                      |                 |                  |
| <b>HIV status</b>                            |                        |          |                  |                      |          |              | Ref.                 |                 |                  |
| Negative                                     |                        |          |                  |                      |          |              | Ref.                 |                 |                  |
| Positive                                     |                        |          |                  |                      |          |              | 0.97 ( 0.40 - 2.31 ) |                 | 0.938            |
| <b>Partner's HIV status</b>                  |                        |          |                  |                      |          |              | Ref.                 |                 |                  |
| Negative                                     |                        |          |                  |                      |          |              | Ref.                 |                 |                  |
| Positive                                     |                        |          |                  |                      |          |              | 2.04 ( 0.82 - 5.09 ) |                 | 0.128            |
| Don't know                                   |                        |          |                  |                      |          |              | 1.04 ( 0.60 - 1.81 ) |                 | 0.887            |
| <b>Perceived risk for HIV/STIs</b>           |                        |          |                  |                      |          |              | Ref.                 |                 |                  |
| No risk at all                               |                        |          |                  |                      |          |              | Ref.                 |                 |                  |
| Small                                        |                        |          |                  |                      |          |              | 0.68 ( 0.39 - 1.20 ) |                 | 0.187            |
| Moderate                                     |                        |          |                  |                      |          |              | 0.79 ( 0.44 - 1.42 ) |                 | 0.437            |
| Great                                        |                        |          |                  |                      |          |              | 0.77 ( 0.41 - 1.47 ) |                 | 0.429            |
| <b>3) HEC use</b>                            |                        |          |                  |                      |          |              |                      |                 |                  |
| <b>Type of HECs</b>                          |                        |          |                  |                      |          |              | Ref.                 |                 |                  |
| Injectables                                  |                        |          |                  |                      |          |              | Ref.                 |                 |                  |
| Implants                                     |                        |          |                  |                      |          |              | 0.86 ( 0.56 - 1.31 ) |                 | 0.483            |
| IUD                                          |                        |          |                  |                      |          |              | 1.23 ( 0.67 - 2.25 ) |                 | 0.511            |
| Pill                                         |                        |          |                  |                      |          |              | 1.36 ( 0.66 - 2.80 ) |                 | 0.408            |
| Female sterilization                         |                        |          |                  |                      |          |              |                      | perfect success |                  |
| <b>4) Other psychosocial characteristics</b> |                        |          |                  |                      |          |              |                      |                 |                  |
| <b>HIV-related knowledge (HIV-KQ-18)</b>     |                        |          |                  |                      |          |              | 1.04 ( 0.96 - 1.12 ) |                 | 0.312            |
| <b>Condom use self-efficacy scale</b>        |                        |          |                  |                      |          |              | 1.03 ( 1.00 - 1.05 ) |                 | <b>0.029</b>     |
| <b>Sexual Relationship Power Scale</b>       |                        |          |                  |                      |          |              | Ref.                 |                 |                  |
| Low                                          |                        |          |                  |                      |          |              | Ref.                 |                 |                  |
| Medium                                       |                        |          |                  |                      |          |              | 1.29 ( 0.81 - 2.05 ) |                 | 0.290            |
| High                                         |                        |          |                  |                      |          |              | 1.42 ( 0.87 - 2.31 ) |                 | 0.165            |

OR: odds ratio; AOR: adjusted odds ratio; SD: standard deviation; HIV: human immunodeficiency virus; STI: sexually transmitted infection; HEC: highly effective contraceptive; IUD: intrauterine device

a. Adjusted for the cluster effect

b. Adjusted for age, education, religion, wealth index, number of children, pregnancy intention, partner's pregnancy intention, history of unintended pregnancy, multiple sex partnership, HIV status, partner's HIV status, risk perception of HIV/STIs, HIV-related knowledge, condom use self-efficacy, and sexual relationship control power.

c. Intervention\*time represents the status of the intervention group at follow-up in comparison with the control group at the baseline.

**Supplementary Table S7. Effects of intervention on consistent dual-method use among women at 2 months after enrollement**

| Variables                                    | Model 1                |          |         | Model 2                |          |         | Model 3                 |          |                 |
|----------------------------------------------|------------------------|----------|---------|------------------------|----------|---------|-------------------------|----------|-----------------|
|                                              | OR                     | (95% CI) | p-value | AOR <sup>a</sup>       | (95% CI) | p-value | AOR <sup>b</sup>        | (95% CI) | p-value         |
| <b>Intervention</b>                          |                        |          |         |                        |          |         |                         |          |                 |
| Control                                      | Ref.                   |          |         | Ref.                   |          |         | Ref.                    |          |                 |
| Intervention                                 | 11.98 ( 4.74 - 30.29 ) |          | <0.001  | 13.71 ( 3.59 - 52.43 ) |          | <0.001  | 14.53 ( 3.63 - 58.134 ) |          | <0.001          |
| <b>1) Socio-demographic characteristics</b>  |                        |          |         |                        |          |         |                         |          |                 |
| <b>Age in years</b>                          |                        |          |         |                        |          |         | 1.01 ( 0.94 - 1.076 )   |          | 0.856           |
| <b>Education</b>                             |                        |          |         |                        |          |         |                         |          |                 |
| Never                                        |                        |          |         |                        |          |         | Ref.                    |          |                 |
| Primary and more                             |                        |          |         |                        |          |         | 0.69 ( 0.34 - 1.3896 )  |          | 0.298           |
| <b>Religion</b>                              |                        |          |         |                        |          |         |                         |          |                 |
| Christian                                    |                        |          |         |                        |          |         | Ref.                    |          |                 |
| Muslim                                       |                        |          |         |                        |          |         | 0.93 ( 0.30 - 2.8508 )  |          | 0.898           |
| <b>Wealth index</b>                          |                        |          |         |                        |          |         |                         |          |                 |
| Poor                                         |                        |          |         |                        |          |         | Ref.                    |          |                 |
| Middle                                       |                        |          |         |                        |          |         | 1.47 ( 0.70 - 3.1084 )  |          | 0.307           |
| Rich                                         |                        |          |         |                        |          |         | 1.37 ( 0.61 - 3.0864 )  |          | 0.441           |
| <b>No. of children</b>                       |                        |          |         |                        |          |         | 0.89 ( 0.69 - 1.1615 )  |          | 0.396           |
| <b>Pregnancy intention</b>                   |                        |          |         |                        |          |         |                         |          |                 |
| No                                           |                        |          |         |                        |          |         | Ref.                    |          |                 |
| Yes                                          |                        |          |         |                        |          |         | 0.56 ( 0.20 - 1.5436 )  |          | 0.264           |
| Don't know                                   |                        |          |         |                        |          |         | 1.51 ( 0.39 - 5.8358 )  |          | 0.551           |
| <b>Partner's pregnancy intention</b>         |                        |          |         |                        |          |         |                         |          |                 |
| No                                           |                        |          |         |                        |          |         | Ref.                    |          |                 |
| Yes                                          |                        |          |         |                        |          |         | 0.89 ( 0.30 - 2.6386 )  |          | 0.834           |
| Don't know                                   |                        |          |         |                        |          |         | 0.59 ( 0.17 - 2.0459 )  |          | 0.405           |
| <b>History of unintended pregnancy</b>       |                        |          |         |                        |          |         |                         |          |                 |
| No                                           |                        |          |         |                        |          |         | Ref.                    |          |                 |
| Yes                                          |                        |          |         |                        |          |         | 0.76 ( 0.39 - 1.4826 )  |          | 0.421           |
| <b>Multiple sex partners</b>                 |                        |          |         |                        |          |         |                         |          |                 |
| No                                           |                        |          |         |                        |          |         | Ref.                    |          |                 |
| Yes                                          |                        |          |         |                        |          |         | 3.21 ( 1.06 - 9.6705 )  |          | <b>0.039</b>    |
| <b>2) HIV-related characteristics</b>        |                        |          |         |                        |          |         |                         |          |                 |
| <b>HIV status</b>                            |                        |          |         |                        |          |         |                         |          |                 |
| Negative                                     |                        |          |         |                        |          |         | Ref.                    |          |                 |
| Positive                                     |                        |          |         |                        |          |         | 1.47 ( 0.39 - 5.5239 )  |          | 0.566           |
| <b>Partner's HIV status</b>                  |                        |          |         |                        |          |         |                         |          |                 |
| Negative                                     |                        |          |         |                        |          |         | Ref.                    |          |                 |
| Positive                                     |                        |          |         |                        |          |         | 1.23 ( 0.28 - 5.4303 )  |          | 0.785           |
| Don't know                                   |                        |          |         |                        |          |         | 1.15 ( 0.48 - 2.7661 )  |          | 0.747           |
| <b>Perceived risk for HIV/STIs</b>           |                        |          |         |                        |          |         |                         |          |                 |
| No risk at all                               |                        |          |         |                        |          |         | Ref.                    |          |                 |
| Small                                        |                        |          |         |                        |          |         | 1.98 ( 0.57 - 6.9055 )  |          | 0.283           |
| Moderate                                     |                        |          |         |                        |          |         | 2.37 ( 0.67 - 8.43 )    |          | 0.181           |
| Great                                        |                        |          |         |                        |          |         | 4.04 ( 1.10 - 14.824 )  |          | 0.035           |
| <b>3) HEC use</b>                            |                        |          |         |                        |          |         |                         |          |                 |
| <b>Type of HECs</b>                          |                        |          |         |                        |          |         |                         |          |                 |
| Injectables                                  |                        |          |         |                        |          |         | Ref.                    |          |                 |
| Implants                                     |                        |          |         |                        |          |         | 0.53 ( 0.27 - 1.0388 )  |          | 0.064           |
| IUD                                          |                        |          |         |                        |          |         | 0.47 ( 0.14 - 1.5696 )  |          | 0.219           |
| Pill                                         |                        |          |         |                        |          |         | 0.16 ( 0.02 - 1.3684 )  |          | 0.093           |
| Female sterilization                         |                        |          |         |                        |          |         |                         |          | perfect success |
| <b>4) Other psychosocial characteristics</b> |                        |          |         |                        |          |         |                         |          |                 |
| <b>HIV-related knowledge (HIV-KQ-18)</b>     |                        |          |         |                        |          |         | 1.02 ( 0.90 - 1.156 )   |          | 0.722           |
| <b>Condom use self-efficacy scale</b>        |                        |          |         |                        |          |         | 0.98 ( 0.94 - 1.0221 )  |          | 0.359           |
| <b>Sexual Relationship Power Scale</b>       |                        |          |         |                        |          |         |                         |          |                 |
| Low                                          |                        |          |         |                        |          |         | Ref.                    |          |                 |
| Medium                                       |                        |          |         |                        |          |         | 1.36 ( 0.62 - 2.9545 )  |          | 0.445           |
| High                                         |                        |          |         |                        |          |         | 1.87 ( 0.84 - 4.1729 )  |          | 0.124           |

OR: odds ratio; AOR: adjusted odds ratio; SD: standard deviation; HIV: human immunodeficiency virus; STI: sexually transmitted infection; HEC: highly effective contraceptive; IUD: intrauterine device

a. Adjusted for the cluster effect

b. Adjusted for age, education, religion, wealth index, number of children, pregnancy intention, partner's pregnancy intention, history of unintended pregnancy, multiple sex partnership, HIV status, partner's HIV status, risk perception of HIV/STIs, HIV-related knowledge, condom use self-efficacy, and sexual relationship control power.

c. Intervention\*time represents the status of the intervention group at follow-up in comparison with the control group at the baseline.

**Supplementary Table S8. Effects of intervention on consistent dual-method use among women at 4 months after enrollement**

| Variables                                    | Model 1                |          |         | Model 2               |          |         | Model 3                |          |                 |
|----------------------------------------------|------------------------|----------|---------|-----------------------|----------|---------|------------------------|----------|-----------------|
|                                              | OR                     | (95% CI) | p-value | AOR <sup>a</sup>      | (95% CI) | p-value | AOR <sup>b</sup>       | (95% CI) | p-value         |
| <b>Intervention</b>                          |                        |          |         |                       |          |         |                        |          |                 |
| Control                                      | Ref.                   |          |         | Ref.                  |          |         | Ref.                   |          |                 |
| Intervention                                 | 5.22 ( 2.42 - 11.279 ) |          | <0.001  | 6.28 ( 2.01 - 19.60 ) |          | 0.002   | 6.30 ( 2.20 - 18.03 )  |          | 0.001           |
| <b>1) Socio-demographic characteristics</b>  |                        |          |         |                       |          |         |                        |          |                 |
| <b>Age in years</b>                          |                        |          |         |                       |          |         |                        |          |                 |
|                                              |                        |          |         |                       |          |         | 1.05 ( 0.98 - 1.12 )   |          | 0.181           |
| <b>Education</b>                             |                        |          |         |                       |          |         |                        |          |                 |
| Never                                        |                        |          |         |                       |          |         | Ref.                   |          |                 |
| Primary and more                             |                        |          |         |                       |          |         | 0.56 ( 0.28 - 1.13 )   |          | 0.104           |
| <b>Religion</b>                              |                        |          |         |                       |          |         |                        |          |                 |
| Christian                                    |                        |          |         |                       |          |         | Ref.                   |          |                 |
| Muslim                                       |                        |          |         |                       |          |         | 0.73 ( 0.19 - 2.82 )   |          | 0.651           |
| <b>Wealth index</b>                          |                        |          |         |                       |          |         |                        |          |                 |
| Poor                                         |                        |          |         |                       |          |         | Ref.                   |          |                 |
| Middle                                       |                        |          |         |                       |          |         | 1.63 ( 0.74 - 3.56 )   |          | 0.224           |
| Rich                                         |                        |          |         |                       |          |         | 1.51 ( 0.65 - 3.54 )   |          | 0.340           |
| <b>No. of children</b>                       |                        |          |         |                       |          |         |                        |          |                 |
|                                              |                        |          |         |                       |          |         | 0.79 ( 0.59 - 1.05 )   |          | 0.104           |
| <b>Pregnancy intention</b>                   |                        |          |         |                       |          |         |                        |          |                 |
| No                                           |                        |          |         |                       |          |         | Ref.                   |          |                 |
| Yes                                          |                        |          |         |                       |          |         | 0.37 ( 0.13 - 1.06 )   |          | 0.063           |
| Don't know                                   |                        |          |         |                       |          |         | 0.61 ( 0.16 - 2.43 )   |          | 0.488           |
| <b>Partner's pregnancy intention</b>         |                        |          |         |                       |          |         |                        |          |                 |
| No                                           |                        |          |         |                       |          |         | Ref.                   |          |                 |
| Yes                                          |                        |          |         |                       |          |         | 1.45 ( 0.47 - 4.49 )   |          | 0.523           |
| Don't know                                   |                        |          |         |                       |          |         | 1.08 ( 0.32 - 3.67 )   |          | 0.907           |
| <b>History of unintended pregnancy</b>       |                        |          |         |                       |          |         |                        |          |                 |
| No                                           |                        |          |         |                       |          |         | Ref.                   |          |                 |
| Yes                                          |                        |          |         |                       |          |         | 0.52 ( 0.24 - 1.12 )   |          | 0.094           |
| <b>Multiple sex partners</b>                 |                        |          |         |                       |          |         |                        |          |                 |
| No                                           |                        |          |         |                       |          |         | Ref.                   |          |                 |
| Yes                                          |                        |          |         |                       |          |         | 0.37 ( 0.05 - 3.05 )   |          | 0.356           |
| <b>2) HIV-related characteristics</b>        |                        |          |         |                       |          |         |                        |          |                 |
| <b>HIV status</b>                            |                        |          |         |                       |          |         |                        |          |                 |
| Negative                                     |                        |          |         |                       |          |         | Ref.                   |          |                 |
| Positive                                     |                        |          |         |                       |          |         | 1.01 ( 0.24 - 4.31 )   |          | 0.985           |
| <b>Partner's HIV status</b>                  |                        |          |         |                       |          |         |                        |          |                 |
| Negative                                     |                        |          |         |                       |          |         | Ref.                   |          |                 |
| Positive                                     |                        |          |         |                       |          |         | 1.84 ( 0.36 - 9.30 )   |          | 0.462           |
| Don't know                                   |                        |          |         |                       |          |         | 1.63 ( 0.68 - 3.92 )   |          | 0.275           |
| <b>Perceived risk for HIV/STIs</b>           |                        |          |         |                       |          |         |                        |          |                 |
| No risk at all                               |                        |          |         |                       |          |         | Ref.                   |          |                 |
| Small                                        |                        |          |         |                       |          |         | 2.14 ( 0.58 - 7.93 )   |          | 0.253           |
| Moderate                                     |                        |          |         |                       |          |         | 2.15 ( 0.56 - 8.32 )   |          | 0.268           |
| Great                                        |                        |          |         |                       |          |         | 1.65 ( 0.39 - 7.03 )   |          | 0.499           |
| <b>3) HEC use</b>                            |                        |          |         |                       |          |         |                        |          |                 |
| <b>Type of HECs</b>                          |                        |          |         |                       |          |         |                        |          |                 |
| Injectables                                  |                        |          |         |                       |          |         | Ref.                   |          |                 |
| Implants                                     |                        |          |         |                       |          |         | 1.01 ( 0.49 - 2.06 )   |          | 0.987           |
| IUD                                          |                        |          |         |                       |          |         | 1.58 ( 0.54 - 4.62 )   |          | 0.400           |
| Pill                                         |                        |          |         |                       |          |         | 0.66 ( 0.13 - 3.32 )   |          | 0.618           |
| Female sterilization                         |                        |          |         |                       |          |         |                        |          | perfect success |
| <b>4) Other psychosocial characteristics</b> |                        |          |         |                       |          |         |                        |          |                 |
| <b>HIV-related knowledge (HIV-KQ-18)</b>     |                        |          |         |                       |          |         |                        |          |                 |
|                                              |                        |          |         |                       |          |         | 0.72 ( 0.32 - 1.63 )   |          | 0.434           |
| <b>Condom use self-efficacy scale</b>        |                        |          |         |                       |          |         |                        |          |                 |
|                                              |                        |          |         |                       |          |         | 0.96 ( 0.42 - 2.21 )   |          | 0.932           |
| <b>Sexual Relationship Power Scale</b>       |                        |          |         |                       |          |         |                        |          |                 |
| Low                                          |                        |          |         |                       |          |         | Ref.                   |          |                 |
| Medium                                       |                        |          |         |                       |          |         | 1.36 ( 0.62 - 2.9545 ) |          | 0.445           |
| High                                         |                        |          |         |                       |          |         | 1.87 ( 0.84 - 4.1729 ) |          | 0.124           |

OR: odds ratio; AOR: adjusted odds ratio; SD: standard deviation; HIV: human immunodeficiency virus; STI: sexually transmitted infection; HEC: highly effective contraceptive; IUD: intrauterine device

a. Adjusted for the cluster effect

b. Adjusted for age, education, religion, wealth index, number of children, pregnancy intention, partner's pregnancy intention, history of unintended pregnancy, multiple sex partnership, HIV status, partner's HIV status, risk perception of HIV/STIs, HIV-related knowledge, condom use self-efficacy, and sexual relationship control power.

c. Intervention\*time represents the status of the intervention group at follow-up in comparison with the control group at the baseline.

**Supplementary Table S9. Effects of intervention on consistent dual-method use among women at 6 months after enrollement**

| Variables                                    | Model 1                |          |         | Model 2               |          |         | Model 3               |          |                 |
|----------------------------------------------|------------------------|----------|---------|-----------------------|----------|---------|-----------------------|----------|-----------------|
|                                              | OR                     | (95% CI) | p-value | AOR <sup>a</sup>      | (95% CI) | p-value | AOR <sup>b</sup>      | (95% CI) | p-value         |
| <b>Intervention</b>                          |                        |          |         |                       |          |         |                       |          |                 |
| Control                                      | Ref.                   |          |         | Ref.                  |          |         | Ref.                  |          |                 |
| Intervention                                 | 6.58 ( 2.53 - 17.074 ) |          | <0.001  | 7.80 ( 1.22 - 49.73 ) |          | 0.030   | 8.04 ( 1.17 - 55.08 ) |          | 0.034           |
| <b>1) Socio-demographic characteristics</b>  |                        |          |         |                       |          |         |                       |          |                 |
| <b>Age in years</b>                          |                        |          |         |                       |          |         |                       |          |                 |
|                                              |                        |          |         |                       |          |         | 1.05 ( 0.96 - 1.15 )  |          | 0.311           |
| <b>Education</b>                             |                        |          |         |                       |          |         |                       |          |                 |
| Never                                        |                        |          |         |                       |          |         | Ref.                  |          |                 |
| Primary and more                             |                        |          |         |                       |          |         | 1.18 ( 0.45 - 3.13 )  |          | 0.738           |
| <b>Religion</b>                              |                        |          |         |                       |          |         |                       |          |                 |
| Christian                                    |                        |          |         |                       |          |         | Ref.                  |          |                 |
| Muslim                                       |                        |          |         |                       |          |         | 1.75 ( 0.46 - 6.61 )  |          | 0.409           |
| <b>Wealth index</b>                          |                        |          |         |                       |          |         |                       |          |                 |
| Poor                                         |                        |          |         |                       |          |         | Ref.                  |          |                 |
| Middle                                       |                        |          |         |                       |          |         | 1.35 ( 0.53 - 3.47 )  |          | 0.528           |
| Rich                                         |                        |          |         |                       |          |         | 0.75 ( 0.26 - 2.20 )  |          | 0.604           |
| <b>No. of children</b>                       |                        |          |         |                       |          |         |                       |          |                 |
|                                              |                        |          |         |                       |          |         | 0.90 ( 0.64 - 1.28 )  |          | 0.560           |
| <b>Pregnancy intention</b>                   |                        |          |         |                       |          |         |                       |          |                 |
| No                                           |                        |          |         |                       |          |         | Ref.                  |          |                 |
| Yes                                          |                        |          |         |                       |          |         | 0.73 ( 0.18 - 2.92 )  |          | 0.657           |
| Don't know                                   |                        |          |         |                       |          |         | 1.31 ( 0.23 - 7.51 )  |          | 0.763           |
| <b>Partner's pregnancy intention</b>         |                        |          |         |                       |          |         |                       |          |                 |
| No                                           |                        |          |         |                       |          |         | Ref.                  |          |                 |
| Yes                                          |                        |          |         |                       |          |         | 1.27 ( 0.30 - 5.40 )  |          | 0.743           |
| Don't know                                   |                        |          |         |                       |          |         | 0.84 ( 0.17 - 4.17 )  |          | 0.836           |
| <b>History of unintended pregnancy</b>       |                        |          |         |                       |          |         |                       |          |                 |
| No                                           |                        |          |         |                       |          |         | Ref.                  |          |                 |
| Yes                                          |                        |          |         |                       |          |         | 0.79 ( 0.32 - 1.96 )  |          | 0.607           |
| <b>Multiple sex partners</b>                 |                        |          |         |                       |          |         |                       |          |                 |
| No                                           |                        |          |         |                       |          |         | Ref.                  |          |                 |
| Yes                                          |                        |          |         |                       |          |         | 1.59 ( 0.29 - 8.78 )  |          | 0.597           |
| <b>2) HIV-related characteristics</b>        |                        |          |         |                       |          |         |                       |          |                 |
| <b>HIV status</b>                            |                        |          |         |                       |          |         |                       |          |                 |
| Negative                                     |                        |          |         |                       |          |         | Ref.                  |          |                 |
| Positive                                     |                        |          |         |                       |          |         | 4.08 ( 0.86 - 19.27 ) |          | 0.076           |
| <b>Partner's HIV status</b>                  |                        |          |         |                       |          |         |                       |          |                 |
| Negative                                     |                        |          |         |                       |          |         | Ref.                  |          |                 |
| Positive                                     |                        |          |         |                       |          |         | 0.51 ( 0.07 - 3.47 )  |          | 0.489           |
| Don't know                                   |                        |          |         |                       |          |         | 0.93 ( 0.30 - 2.92 )  |          | 0.901           |
| <b>Perceived risk for HIV/STIs</b>           |                        |          |         |                       |          |         |                       |          |                 |
| No risk at all                               |                        |          |         |                       |          |         | Ref.                  |          |                 |
| Small                                        |                        |          |         |                       |          |         | 1.21 ( 0.29 - 5.09 )  |          | 0.791           |
| Moderate                                     |                        |          |         |                       |          |         | 0.91 ( 0.20 - 4.25 )  |          | 0.907           |
| Great                                        |                        |          |         |                       |          |         | 0.98 ( 0.20 - 4.82 )  |          | 0.983           |
| <b>3) HEC use</b>                            |                        |          |         |                       |          |         |                       |          |                 |
| <b>Type of HECs</b>                          |                        |          |         |                       |          |         |                       |          |                 |
| Injectables                                  |                        |          |         |                       |          |         | Ref.                  |          |                 |
| Implants                                     |                        |          |         |                       |          |         | 1.09 ( 0.44 - 2.67 )  |          | 0.853           |
| IUD                                          |                        |          |         |                       |          |         | 1.95 ( 0.55 - 6.93 )  |          | 0.304           |
| Pill                                         |                        |          |         |                       |          |         | 1.51 ( 0.27 - 8.57 )  |          | 0.642           |
| Female sterilization                         |                        |          |         |                       |          |         |                       |          | perfect success |
| <b>4) Other psychosocial characteristics</b> |                        |          |         |                       |          |         |                       |          |                 |
| <b>HIV-related knowledge (HIV-KQ-18)</b>     |                        |          |         |                       |          |         |                       |          |                 |
|                                              |                        |          |         |                       |          |         | 1.02 ( 0.87 - 1.18 )  |          | 0.834           |
| <b>Condom use self-efficacy scale</b>        |                        |          |         |                       |          |         |                       |          |                 |
|                                              |                        |          |         |                       |          |         | 1.02 ( 0.97 - 1.07 )  |          | 0.549           |
| <b>Sexual Relationship Power Scale</b>       |                        |          |         |                       |          |         |                       |          |                 |
| Low                                          |                        |          |         |                       |          |         | Ref.                  |          |                 |
| Medium                                       |                        |          |         |                       |          |         | 0.93 ( 0.36 - 2.43 )  |          | 0.885           |
| High                                         |                        |          |         |                       |          |         | 0.56 ( 0.18 - 1.71 )  |          | 0.310           |

OR: odds ratio; AOR: adjusted odds ratio; SD: standard deviation; HIV: human immunodeficiency virus; STI: sexually transmitted infection; HEC: highly effective contraceptive; IUD: intrauterine device

a. Adjusted for the cluster effect

b. Adjusted for age, education, religion, wealth index, number of children, pregnancy intention, partner's pregnancy intention, history of unintended pregnancy, multiple sex partnership, HIV status, partner's HIV status, risk perception of HIV/STIs, HIV-related knowledge, condom use self-efficacy, and sexual relationship control power.

c. Intervention\*time represents the status of the intervention group at follow-up in comparison with the control group at the baseline.

**Supplementary Table S10. Effects of intervention on consistent dual-method use among women at 8 months after enrollement**

| Variables                                    | Model 1                |          |         | Model 2               |          |         | Model 3                |          |                 |
|----------------------------------------------|------------------------|----------|---------|-----------------------|----------|---------|------------------------|----------|-----------------|
|                                              | OR                     | (95% CI) | p-value | AOR <sup>a</sup>      | (95% CI) | p-value | AOR <sup>b</sup>       | (95% CI) | p-value         |
| <b>Intervention</b>                          |                        |          |         |                       |          |         |                        |          |                 |
| Control                                      | Ref.                   |          |         | Ref.                  |          |         | Ref.                   |          |                 |
| Intervention                                 | 9.43 ( 3.70 - 24.055 ) |          | <0.001  | 9.97 ( 2.11 - 47.15 ) |          | 0.004   | 10.72 ( 2.03 - 56.64 ) |          | 0.005           |
| <b>1) Socio-demographic characteristics</b>  |                        |          |         |                       |          |         |                        |          |                 |
| <b>Age in years</b>                          |                        |          |         |                       |          |         |                        |          |                 |
|                                              |                        |          |         |                       |          |         | 1.05 ( 0.96 - 1.14 )   |          | 0.270           |
| <b>Education</b>                             |                        |          |         |                       |          |         |                        |          |                 |
| Never                                        |                        |          |         |                       |          |         | Ref.                   |          |                 |
| Primary and more                             |                        |          |         |                       |          |         | 0.90 ( 0.40 - 2.00 )   |          | 0.788           |
| <b>Religion</b>                              |                        |          |         |                       |          |         |                        |          |                 |
| Christian                                    |                        |          |         |                       |          |         | Ref.                   |          |                 |
| Muslim                                       |                        |          |         |                       |          |         | 1.15 ( 0.31 - 4.29 )   |          | 0.832           |
| <b>Wealth index</b>                          |                        |          |         |                       |          |         |                        |          |                 |
| Poor                                         |                        |          |         |                       |          |         | Ref.                   |          |                 |
| Middle                                       |                        |          |         |                       |          |         | 1.46 ( 0.63 - 3.38 )   |          | 0.373           |
| Rich                                         |                        |          |         |                       |          |         | 1.52 ( 0.61 - 3.80 )   |          | 0.373           |
| <b>No. of children</b>                       |                        |          |         |                       |          |         |                        |          |                 |
|                                              |                        |          |         |                       |          |         | 0.89 ( 0.65 - 1.22 )   |          | 0.463           |
| <b>Pregnancy intention</b>                   |                        |          |         |                       |          |         |                        |          |                 |
| No                                           |                        |          |         |                       |          |         | Ref.                   |          |                 |
| Yes                                          |                        |          |         |                       |          |         | 0.40 ( 0.12 - 1.34 )   |          | 0.137           |
| Don't know                                   |                        |          |         |                       |          |         | 0.93 ( 0.22 - 3.98 )   |          | 0.923           |
| <b>Partner's pregnancy intention</b>         |                        |          |         |                       |          |         |                        |          |                 |
| No                                           |                        |          |         |                       |          |         | Ref.                   |          |                 |
| Yes                                          |                        |          |         |                       |          |         | 1.80 ( 0.47 - 6.86 )   |          | 0.390           |
| Don't know                                   |                        |          |         |                       |          |         | 1.34 ( 0.34 - 5.24 )   |          | 0.674           |
| <b>History of unintended pregnancy</b>       |                        |          |         |                       |          |         |                        |          |                 |
| No                                           |                        |          |         |                       |          |         | Ref.                   |          |                 |
| Yes                                          |                        |          |         |                       |          |         | 0.86 ( 0.40 - 1.83 )   |          | 0.688           |
| <b>Multiple sex partners</b>                 |                        |          |         |                       |          |         |                        |          |                 |
| No                                           |                        |          |         |                       |          |         | Ref.                   |          |                 |
| Yes                                          |                        |          |         |                       |          |         | 0.94 ( 0.17 - 5.16 )   |          | 0.942           |
| <b>2) HIV-related characteristics</b>        |                        |          |         |                       |          |         |                        |          |                 |
| <b>HIV status</b>                            |                        |          |         |                       |          |         |                        |          |                 |
| Negative                                     |                        |          |         |                       |          |         | Ref.                   |          |                 |
| Positive                                     |                        |          |         |                       |          |         | 1.16 ( 0.20 - 6.63 )   |          | 0.868           |
| <b>Partner's HIV status</b>                  |                        |          |         |                       |          |         |                        |          |                 |
| Negative                                     |                        |          |         |                       |          |         | Ref.                   |          |                 |
| Positive                                     |                        |          |         |                       |          |         | 1.12 ( 0.18 - 7.00 )   |          | 0.905           |
| Don't know                                   |                        |          |         |                       |          |         | 0.41 ( 0.12 - 1.36 )   |          | 0.146           |
| <b>Perceived risk for HIV/STIs</b>           |                        |          |         |                       |          |         |                        |          |                 |
| No risk at all                               |                        |          |         |                       |          |         | Ref.                   |          |                 |
| Small                                        |                        |          |         |                       |          |         | 0.85 ( 0.27 - 2.70 )   |          | 0.782           |
| Moderate                                     |                        |          |         |                       |          |         | 0.96 ( 0.29 - 3.16 )   |          | 0.944           |
| Great                                        |                        |          |         |                       |          |         | 1.20 ( 0.33 - 4.34 )   |          | 0.785           |
| <b>3) HEC use</b>                            |                        |          |         |                       |          |         |                        |          |                 |
| <b>Type of HECs</b>                          |                        |          |         |                       |          |         |                        |          |                 |
| Injectables                                  |                        |          |         |                       |          |         | Ref.                   |          |                 |
| Implants                                     |                        |          |         |                       |          |         | 0.85 ( 0.38 - 1.89 )   |          | 0.685           |
| IUD                                          |                        |          |         |                       |          |         | 2.55 ( 0.87 - 7.46 )   |          | 0.087           |
| Pill                                         |                        |          |         |                       |          |         | 0.60 ( 0.11 - 3.37 )   |          | 0.566           |
| Female sterilization                         |                        |          |         |                       |          |         |                        |          | perfect success |
| <b>4) Other psychosocial characteristics</b> |                        |          |         |                       |          |         |                        |          |                 |
| <b>HIV-related knowledge (HIV-KQ-18)</b>     |                        |          |         |                       |          |         |                        |          |                 |
|                                              |                        |          |         |                       |          |         | 1.02 ( 0.89 - 1.16 )   |          | 0.779           |
| <b>Condom use self-efficacy scale</b>        |                        |          |         |                       |          |         |                        |          |                 |
|                                              |                        |          |         |                       |          |         | 1.00 ( 0.96 - 1.05 )   |          | 0.858           |
| <b>Sexual Relationship Power Scale</b>       |                        |          |         |                       |          |         |                        |          |                 |
| Low                                          |                        |          |         |                       |          |         | Ref.                   |          |                 |
| Medium                                       |                        |          |         |                       |          |         | 0.90 ( 0.37 - 2.16 )   |          | 0.806           |
| High                                         |                        |          |         |                       |          |         | 1.11 ( 0.44 - 2.83 )   |          | 0.829           |

OR: odds ratio; AOR: adjusted odds ratio; SD: standard deviation; HIV: human immunodeficiency virus; STI: sexually transmitted infection; HEC: highly effective contraceptive; IUD: intrauterine device

a. Adjusted for the cluster effect

b. Adjusted for age, education, religion, wealth index, number of children, pregnancy intention, partner's pregnancy intention, history of unintended pregnancy, multiple sex partnership, HIV status, partner's HIV status, risk perception of HIV/STIs, HIV-related knowledge, condom use self-efficacy, and sexual relationship control power.

c. Intervention\*time represents the status of the intervention group at follow-up in comparison with the control group at the baseline.



**Supplementary Table S11. Effects of intervention on communication about HIV/STI risk among women at 2 months after enrolment**

| Variables                                    | Model 1              |          |         | Model 2              |          |         | Model 3               |          |         |
|----------------------------------------------|----------------------|----------|---------|----------------------|----------|---------|-----------------------|----------|---------|
|                                              | OR                   | (95% CI) | p-value | AOR <sup>a</sup>     | (95% CI) | p-value | AOR <sup>b</sup>      | (95% CI) | p-value |
| <b>Intervention</b>                          |                      |          |         |                      |          |         |                       |          |         |
| Control                                      | Ref.                 |          |         | Ref.                 |          |         | Ref.                  |          |         |
| Intervention                                 | 2.73 ( 1.92 - 3.90 ) |          | <0.001  | 1.03 ( 0.73 - 1.46 ) |          | 0.863   | 0.98 ( 0.68 - 1.42 )  |          | 0.920   |
| <b>Time</b>                                  |                      |          |         | 2.19 ( 1.62 - 2.97 ) |          | <0.001  | 2.29 ( 1.70 - 3.09 )  |          | <0.001  |
| <b>Intervention*time<sup>c</sup></b>         |                      |          |         | 2.70 ( 1.72 - 4.23 ) |          | <0.001  | 2.70 ( 1.72 - 4.24 )  |          | <0.001  |
| <b>1) Socio-demographic characteristics</b>  |                      |          |         |                      |          |         |                       |          |         |
| <b>Age in years</b>                          |                      |          |         |                      |          |         | 0.99 ( 0.97 - 1.02 )  |          | 0.518   |
| <b>Education</b>                             |                      |          |         |                      |          |         | Ref.                  |          |         |
| Never                                        |                      |          |         |                      |          |         | Ref.                  |          |         |
| Primary and more                             |                      |          |         |                      |          |         | 0.92 ( 0.70 - 1.20 )  |          | 0.527   |
| <b>Religion</b>                              |                      |          |         |                      |          |         | Ref.                  |          |         |
| Christian                                    |                      |          |         |                      |          |         | Ref.                  |          |         |
| Muslim                                       |                      |          |         |                      |          |         | 0.88 ( 0.59 - 1.32 )  |          | 0.540   |
| <b>Wealth index</b>                          |                      |          |         |                      |          |         | Ref.                  |          |         |
| Poor                                         |                      |          |         |                      |          |         | Ref.                  |          |         |
| Middle                                       |                      |          |         |                      |          |         | 0.98 ( 0.75 - 1.29 )  |          | 0.909   |
| Rich                                         |                      |          |         |                      |          |         | 0.97 ( 0.73 - 1.30 )  |          | 0.852   |
| <b>No. of children</b>                       |                      |          |         |                      |          |         | 0.92 ( 0.84 - 1.02 )  |          | 0.101   |
| <b>Pregnancy intention</b>                   |                      |          |         |                      |          |         | Ref.                  |          |         |
| No                                           |                      |          |         |                      |          |         | Ref.                  |          |         |
| Yes                                          |                      |          |         |                      |          |         | 0.77 ( 0.52 - 1.13 )  |          | 0.185   |
| Don't know                                   |                      |          |         |                      |          |         | 0.75 ( 0.45 - 1.23 )  |          | 0.247   |
| <b>Partner's pregnancy intention</b>         |                      |          |         |                      |          |         | Ref.                  |          |         |
| No                                           |                      |          |         |                      |          |         | Ref.                  |          |         |
| Yes                                          |                      |          |         |                      |          |         | 1.14 ( 0.74 - 1.75 )  |          | 0.560   |
| Don't know                                   |                      |          |         |                      |          |         | 1.13 ( 0.73 - 1.76 )  |          | 0.588   |
| <b>History of unintended pregnancy</b>       |                      |          |         |                      |          |         | Ref.                  |          |         |
| No                                           |                      |          |         |                      |          |         | Ref.                  |          |         |
| Yes                                          |                      |          |         |                      |          |         | 1.30 ( 1.02 - 1.66 )  |          | 0.037   |
| <b>Multiple sex partners</b>                 |                      |          |         |                      |          |         | Ref.                  |          |         |
| No                                           |                      |          |         |                      |          |         | Ref.                  |          |         |
| Yes                                          |                      |          |         |                      |          |         | 1.88 ( 1.12 - 3.17 )  |          | 0.017   |
| <b>2) HIV-related characteristics</b>        |                      |          |         |                      |          |         |                       |          |         |
| <b>HIV status</b>                            |                      |          |         |                      |          |         | Ref.                  |          |         |
| Negative                                     |                      |          |         |                      |          |         | Ref.                  |          |         |
| Positive                                     |                      |          |         |                      |          |         | 2.03 ( 1.06 - 3.89 )  |          | 0.034   |
| <b>Partner's HIV status</b>                  |                      |          |         |                      |          |         | Ref.                  |          |         |
| Negative                                     |                      |          |         |                      |          |         | Ref.                  |          |         |
| Positive                                     |                      |          |         |                      |          |         | 0.87 ( 0.44 - 1.72 )  |          | 0.683   |
| Don't know                                   |                      |          |         |                      |          |         | 0.90 ( 0.65 - 1.25 )  |          | 0.518   |
| <b>Perceived risk for HIV/STIs</b>           |                      |          |         |                      |          |         | Ref.                  |          |         |
| No risk at all                               |                      |          |         |                      |          |         | Ref.                  |          |         |
| Small                                        |                      |          |         |                      |          |         | 1.07 ( 0.77 - 1.48 )  |          | 0.704   |
| Moderate                                     |                      |          |         |                      |          |         | 1.10 ( 0.78 - 1.55 )  |          | 0.598   |
| Great                                        |                      |          |         |                      |          |         | 1.04 ( 0.71 - 1.53 )  |          | 0.835   |
| <b>3) HEC use</b>                            |                      |          |         |                      |          |         |                       |          |         |
| <b>Type of HECs</b>                          |                      |          |         |                      |          |         | Ref.                  |          |         |
| Injectables                                  |                      |          |         |                      |          |         | Ref.                  |          |         |
| Implants                                     |                      |          |         |                      |          |         | 0.97 ( 0.76 - 1.24 )  |          | 0.817   |
| IUD                                          |                      |          |         |                      |          |         | 1.17 ( 0.80 - 1.70 )  |          | 0.421   |
| Pill                                         |                      |          |         |                      |          |         | 1.07 ( 0.68 - 1.70 )  |          | 0.765   |
| Female sterilization                         |                      |          |         |                      |          |         | 3.75 ( 0.61 - 22.98 ) |          | 0.153   |
| <b>4) Other psychosocial characteristics</b> |                      |          |         |                      |          |         |                       |          |         |
| <b>HIV-related knowledge (HIV-KQ-18)</b>     |                      |          |         |                      |          |         | 1.04 ( 1.00 - 1.09 )  |          | 0.058   |
| <b>Condom use self-efficacy scale</b>        |                      |          |         |                      |          |         | 1.04 ( 1.02 - 1.05 )  |          | <0.001  |
| <b>Sexual Relationship Power Scale</b>       |                      |          |         |                      |          |         | Ref.                  |          |         |
| Low                                          |                      |          |         |                      |          |         | Ref.                  |          |         |
| Medium                                       |                      |          |         |                      |          |         | 1.02 ( 0.79 - 1.33 )  |          | 0.858   |
| High                                         |                      |          |         |                      |          |         | 1.19 ( 0.89 - 1.59 )  |          | 0.248   |

OR: odds ratio; AOR: adjusted odds ratio; SD: standard deviation; HIV: human immunodeficiency virus; STI: sexually transmitted infection; HEC: highly effective contraceptive; IUD: intrauterine device

a. Adjusted for the cluster effect

b. Adjusted for age, education, religion, wealth index, number of children, pregnancy intention, partner's pregnancy intention, history of unintended pregnancy, multiple sex partnership, HIV status, partner's HIV status, risk perception of HIV/STIs, HIV-related knowledge, condom use self-efficacy, and sexual relationship control power.

c. Intervention\*time represents the status of the intervention group at follow-up in comparison with the control group at the baseline.

**Supplementary Table S12. Effects of intervention on communication about HIV/STI risk among women at 4 months after enrolment**

| Variables                                    | Model 1              |          |              | Model 2              |          |                  | Model 3               |          |                  |
|----------------------------------------------|----------------------|----------|--------------|----------------------|----------|------------------|-----------------------|----------|------------------|
|                                              | OR                   | (95% CI) | p-value      | AOR <sup>a</sup>     | (95% CI) | p-value          | AOR <sup>b</sup>      | (95% CI) | p-value          |
| <b>Intervention</b>                          |                      |          |              |                      |          |                  |                       |          |                  |
| Control                                      | Ref.                 |          |              | Ref.                 |          |                  | Ref.                  |          |                  |
| Intervention                                 | 1.81 ( 1.21 - 2.71 ) |          | <b>0.004</b> | 1.04 ( 0.72 - 1.50 ) |          | 0.841            | 0.99 ( 0.68 - 1.44 )  |          | 0.943            |
| <b>Time</b>                                  |                      |          |              | 5.07 ( 3.55 - 7.25 ) |          | <b>&lt;0.001</b> | 5.72 ( 4.08 - 8.02 )  |          | <b>&lt;0.001</b> |
| <b>Intervention*time<sup>c</sup></b>         |                      |          |              | 1.76 ( 1.08 - 2.86 ) |          | <b>0.023</b>     | 1.76 ( 1.07 - 2.89 )  |          | <b>0.025</b>     |
| <b>1) Socio-demographic characteristics</b>  |                      |          |              |                      |          |                  |                       |          |                  |
| <b>Age in years</b>                          |                      |          |              |                      |          |                  | 1.00 ( 0.98 - 1.03 )  |          | 0.973            |
| <b>Education</b>                             |                      |          |              |                      |          |                  |                       |          |                  |
| Never                                        |                      |          |              |                      |          |                  | Ref.                  |          |                  |
| Primary and more                             |                      |          |              |                      |          |                  | 0.88 ( 0.66 - 1.17 )  |          | 0.372            |
| <b>Religion</b>                              |                      |          |              |                      |          |                  |                       |          |                  |
| Christian                                    |                      |          |              |                      |          |                  | Ref.                  |          |                  |
| Muslim                                       |                      |          |              |                      |          |                  | 0.88 ( 0.57 - 1.34 )  |          | 0.548            |
| <b>Wealth index</b>                          |                      |          |              |                      |          |                  |                       |          |                  |
| Poor                                         |                      |          |              |                      |          |                  | Ref.                  |          |                  |
| Middle                                       |                      |          |              |                      |          |                  | 1.01 ( 0.76 - 1.34 )  |          | 0.947            |
| Rich                                         |                      |          |              |                      |          |                  | 0.88 ( 0.64 - 1.19 )  |          | 0.396            |
| <b>No. of children</b>                       |                      |          |              |                      |          |                  | 0.92 ( 0.83 - 1.02 )  |          | 0.109            |
| <b>Pregnancy intention</b>                   |                      |          |              |                      |          |                  |                       |          |                  |
| No                                           |                      |          |              |                      |          |                  | Ref.                  |          |                  |
| Yes                                          |                      |          |              |                      |          |                  | 0.97 ( 0.64 - 1.45 )  |          | 0.868            |
| Don't know                                   |                      |          |              |                      |          |                  | 1.07 ( 0.64 - 1.81 )  |          | 0.790            |
| <b>Partner's pregnancy intention</b>         |                      |          |              |                      |          |                  |                       |          |                  |
| No                                           |                      |          |              |                      |          |                  | Ref.                  |          |                  |
| Yes                                          |                      |          |              |                      |          |                  | 1.12 ( 0.71 - 1.76 )  |          | 0.636            |
| Don't know                                   |                      |          |              |                      |          |                  | 0.99 ( 0.62 - 1.58 )  |          | 0.964            |
| <b>History of unintended pregnancy</b>       |                      |          |              |                      |          |                  |                       |          |                  |
| No                                           |                      |          |              |                      |          |                  | Ref.                  |          |                  |
| Yes                                          |                      |          |              |                      |          |                  | 1.66 ( 1.28 - 2.16 )  |          | <b>&lt;0.001</b> |
| <b>Multiple sex partners</b>                 |                      |          |              |                      |          |                  |                       |          |                  |
| No                                           |                      |          |              |                      |          |                  | Ref.                  |          |                  |
| Yes                                          |                      |          |              |                      |          |                  | 1.86 ( 1.08 - 3.19 )  |          | <b>0.025</b>     |
| <b>2) HIV-related characteristics</b>        |                      |          |              |                      |          |                  |                       |          |                  |
| <b>HIV status</b>                            |                      |          |              |                      |          |                  |                       |          |                  |
| Negative                                     |                      |          |              |                      |          |                  | Ref.                  |          |                  |
| Positive                                     |                      |          |              |                      |          |                  | 1.88 ( 0.95 - 3.73 )  |          | 0.072            |
| <b>Partner's HIV status</b>                  |                      |          |              |                      |          |                  |                       |          |                  |
| Negative                                     |                      |          |              |                      |          |                  | Ref.                  |          |                  |
| Positive                                     |                      |          |              |                      |          |                  | 0.96 ( 0.46 - 1.98 )  |          | 0.907            |
| Don't know                                   |                      |          |              |                      |          |                  | 0.87 ( 0.61 - 1.22 )  |          | 0.410            |
| <b>Perceived risk for HIV/STIs</b>           |                      |          |              |                      |          |                  |                       |          |                  |
| No risk at all                               |                      |          |              |                      |          |                  | Ref.                  |          |                  |
| Small                                        |                      |          |              |                      |          |                  | 1.14 ( 0.80 - 1.61 )  |          | 0.470            |
| Moderate                                     |                      |          |              |                      |          |                  | 1.07 ( 0.74 - 1.54 )  |          | 0.725            |
| Great                                        |                      |          |              |                      |          |                  | 1.09 ( 0.73 - 1.64 )  |          | 0.677            |
| <b>3) HEC use</b>                            |                      |          |              |                      |          |                  |                       |          |                  |
| <b>Type of HECs</b>                          |                      |          |              |                      |          |                  |                       |          |                  |
| Injectables                                  |                      |          |              |                      |          |                  | Ref.                  |          |                  |
| Implants                                     |                      |          |              |                      |          |                  | 0.87 ( 0.67 - 1.13 )  |          | 0.287            |
| IUD                                          |                      |          |              |                      |          |                  | 1.29 ( 0.87 - 1.93 )  |          | 0.206            |
| Pill                                         |                      |          |              |                      |          |                  | 1.24 ( 0.75 - 2.04 )  |          | 0.400            |
| Female sterilization                         |                      |          |              |                      |          |                  | 3.41 ( 0.52 - 22.20 ) |          | 0.200            |
| <b>4) Other psychosocial characteristics</b> |                      |          |              |                      |          |                  |                       |          |                  |
| <b>HIV-related knowledge (HIV-KQ-18)</b>     |                      |          |              |                      |          |                  | 1.03 ( 0.98 - 1.08 )  |          | 0.219            |
| <b>Condom use self-efficacy scale</b>        |                      |          |              |                      |          |                  | 1.04 ( 1.03 - 1.06 )  |          | <b>&lt;0.001</b> |
| <b>Sexual Relationship Power Scale</b>       |                      |          |              |                      |          |                  |                       |          |                  |
| Low                                          |                      |          |              |                      |          |                  | Ref.                  |          |                  |
| Medium                                       |                      |          |              |                      |          |                  | 1.12 ( 0.85 - 1.47 )  |          | 0.419            |
| High                                         |                      |          |              |                      |          |                  | 1.32 ( 0.97 - 1.81 )  |          | 0.075            |

OR: odds ratio; AOR: adjusted odds ratio; SD: standard deviation; HIV: human immunodeficiency virus; STI: sexually transmitted infection; HEC: highly effective contraceptive; IUD: intrauterine device

a. Adjusted for the cluster effect

b. Adjusted for age, education, religion, wealth index, number of children, pregnancy intention, partner's pregnancy intention, history of unintended pregnancy, multiple sex partnership, HIV status, partner's HIV status, risk perception of HIV/STIs, HIV-related knowledge, condom use self-efficacy, and sexual relationship control power.

c. Intervention\*time represents the status of the intervention group at follow-up in comparison with the control group at the baseline.

**Supplementary Table S13. Effects of intervention on communication about HIV/STI risk among women at 6 months after enrolment**

| Variables                                    | Model 1              |          |         | Model 2              |          |         | Model 3              |          |         |
|----------------------------------------------|----------------------|----------|---------|----------------------|----------|---------|----------------------|----------|---------|
|                                              | OR                   | (95% CI) | p-value | AOR <sup>a</sup>     | (95% CI) | p-value | AOR <sup>b</sup>     | (95% CI) | p-value |
| <b>Intervention</b>                          |                      |          |         |                      |          |         |                      |          |         |
| Control                                      | Ref.                 |          |         | Ref.                 |          |         | Ref.                 |          |         |
| Intervention                                 | 3.33 ( 2.13 - 5.20 ) |          | <0.001  | 1.05 ( 0.78 - 1.41 ) |          | 0.741   | 1.00 ( 0.74 - 1.35 ) |          | 0.991   |
| <b>Time</b>                                  |                      |          |         | 4.12 ( 3.04 - 5.59 ) |          | <0.001  | 4.45 ( 3.25 - 6.10 ) |          | <0.001  |
| <b>Intervention*time<sup>c</sup></b>         |                      |          |         | 3.23 ( 1.93 - 5.41 ) |          | <0.001  | 3.35 ( 1.99 - 5.66 ) |          | <0.001  |
| <b>1) Socio-demographic characteristics</b>  |                      |          |         |                      |          |         |                      |          |         |
| <b>Age in years</b>                          |                      |          |         |                      |          |         | 0.99 ( 0.96 - 1.01 ) |          | 0.298   |
| <b>Education</b>                             |                      |          |         |                      |          |         | Ref.                 |          |         |
| Never                                        |                      |          |         |                      |          |         | Ref.                 |          |         |
| Primary and more                             |                      |          |         |                      |          |         | 0.91 ( 0.69 - 1.20 ) |          | 0.492   |
| <b>Religion</b>                              |                      |          |         |                      |          |         | Ref.                 |          |         |
| Christian                                    |                      |          |         |                      |          |         | Ref.                 |          |         |
| Muslim                                       |                      |          |         |                      |          |         | 0.99 ( 0.65 - 1.51 ) |          | 0.967   |
| <b>Wealth index</b>                          |                      |          |         |                      |          |         | Ref.                 |          |         |
| Poor                                         |                      |          |         |                      |          |         | Ref.                 |          |         |
| Middle                                       |                      |          |         |                      |          |         | 1.01 ( 0.76 - 1.34 ) |          | 0.958   |
| Rich                                         |                      |          |         |                      |          |         | 0.90 ( 0.66 - 1.22 ) |          | 0.481   |
| <b>No. of children</b>                       |                      |          |         |                      |          |         | 0.95 ( 0.86 - 1.05 ) |          | 0.291   |
| <b>Pregnancy intention</b>                   |                      |          |         |                      |          |         | Ref.                 |          |         |
| No                                           |                      |          |         |                      |          |         | Ref.                 |          |         |
| Yes                                          |                      |          |         |                      |          |         | 1.12 ( 0.75 - 1.67 ) |          | 0.576   |
| Don't know                                   |                      |          |         |                      |          |         | 0.93 ( 0.56 - 1.56 ) |          | 0.795   |
| <b>Partner's pregnancy intention</b>         |                      |          |         |                      |          |         | Ref.                 |          |         |
| No                                           |                      |          |         |                      |          |         | Ref.                 |          |         |
| Yes                                          |                      |          |         |                      |          |         | 0.91 ( 0.58 - 1.42 ) |          | 0.678   |
| Don't know                                   |                      |          |         |                      |          |         | 0.89 ( 0.56 - 1.41 ) |          | 0.621   |
| <b>History of unintended pregnancy</b>       |                      |          |         |                      |          |         | Ref.                 |          |         |
| No                                           |                      |          |         |                      |          |         | Ref.                 |          |         |
| Yes                                          |                      |          |         |                      |          |         | 1.45 ( 1.12 - 1.87 ) |          | 0.005   |
| <b>Multiple sex partners</b>                 |                      |          |         |                      |          |         | Ref.                 |          |         |
| No                                           |                      |          |         |                      |          |         | Ref.                 |          |         |
| Yes                                          |                      |          |         |                      |          |         | 2.29 ( 1.32 - 3.99 ) |          | 0.003   |
| <b>2) HIV-related characteristics</b>        |                      |          |         |                      |          |         |                      |          |         |
| <b>HIV status</b>                            |                      |          |         |                      |          |         | Ref.                 |          |         |
| Negative                                     |                      |          |         |                      |          |         | Ref.                 |          |         |
| Positive                                     |                      |          |         |                      |          |         | 1.19 ( 0.62 - 2.29 ) |          | 0.591   |
| <b>Partner's HIV status</b>                  |                      |          |         |                      |          |         | Ref.                 |          |         |
| Negative                                     |                      |          |         |                      |          |         | Ref.                 |          |         |
| Positive                                     |                      |          |         |                      |          |         | 1.09 ( 0.54 - 2.19 ) |          | 0.807   |
| Don't know                                   |                      |          |         |                      |          |         | 1.03 ( 0.73 - 1.45 ) |          | 0.858   |
| <b>Perceived risk for HIV/STIs</b>           |                      |          |         |                      |          |         | Ref.                 |          |         |
| No risk at all                               |                      |          |         |                      |          |         | Ref.                 |          |         |
| Small                                        |                      |          |         |                      |          |         | 1.14 ( 0.81 - 1.61 ) |          | 0.443   |
| Moderate                                     |                      |          |         |                      |          |         | 1.03 ( 0.72 - 1.48 ) |          | 0.875   |
| Great                                        |                      |          |         |                      |          |         | 1.05 ( 0.70 - 1.56 ) |          | 0.828   |
| <b>3) HEC use</b>                            |                      |          |         |                      |          |         |                      |          |         |
| <b>Type of HECs</b>                          |                      |          |         |                      |          |         | Ref.                 |          |         |
| Injectables                                  |                      |          |         |                      |          |         | Ref.                 |          |         |
| Implants                                     |                      |          |         |                      |          |         | 1.03 ( 0.80 - 1.33 ) |          | 0.810   |
| IUD                                          |                      |          |         |                      |          |         | 0.97 ( 0.66 - 1.42 ) |          | 0.869   |
| Pill                                         |                      |          |         |                      |          |         | 1.30 ( 0.80 - 2.12 ) |          | 0.288   |
| Female sterilization                         |                      |          |         |                      |          |         | 1.51 ( 0.25 - 9.05 ) |          | 0.650   |
| <b>4) Other psychosocial characteristics</b> |                      |          |         |                      |          |         |                      |          |         |
| <b>HIV-related knowledge (HIV-KQ-18)</b>     |                      |          |         |                      |          |         | 1.04 ( 0.99 - 1.08 ) |          | 0.106   |
| <b>Condom use self-efficacy scale</b>        |                      |          |         |                      |          |         | 1.03 ( 1.02 - 1.05 ) |          | <0.001  |
| <b>Sexual Relationship Power Scale</b>       |                      |          |         |                      |          |         | Ref.                 |          |         |
| Low                                          |                      |          |         |                      |          |         | Ref.                 |          |         |
| Medium                                       |                      |          |         |                      |          |         | 1.09 ( 0.83 - 1.43 ) |          | 0.551   |
| High                                         |                      |          |         |                      |          |         | 1.27 ( 0.94 - 1.72 ) |          | 0.122   |

OR: odds ratio; AOR: adjusted odds ratio; SD: standard deviation; HIV: human immunodeficiency virus; STI: sexually transmitted infection; HEC: highly effective contraceptive; IUD: intrauterine device

a. Adjusted for the cluster effect

b. Adjusted for age, education, religion, wealth index, number of children, pregnancy intention, partner's pregnancy intention, history of unintended pregnancy, multiple sex partnership, HIV status, partner's HIV status, risk perception of HIV/STIs, HIV-related knowledge, condom use self-efficacy, and sexual relationship control power.

c. Intervention\*time represents the status of the intervention group at follow-up in comparison with the control group at the baseline.

**Supplementary Table S14. Effects of intervention on communication about HIV/STI risk among women at 8 months after enrolment**

| Variables                                    | Model 1              |          |              | Model 2              |          |                  | Model 3               |          |                  |
|----------------------------------------------|----------------------|----------|--------------|----------------------|----------|------------------|-----------------------|----------|------------------|
|                                              | OR                   | (95% CI) | p-value      | AOR <sup>a</sup>     | (95% CI) | p-value          | AOR <sup>b</sup>      | (95% CI) | p-value          |
| <b>Intervention</b>                          |                      |          |              |                      |          |                  |                       |          |                  |
| Control                                      | Ref.                 |          |              | Ref.                 |          |                  | Ref.                  |          |                  |
| Intervention                                 | 1.75 ( 1.22 - 2.52 ) |          | <b>0.002</b> | 1.04 ( 0.68 - 1.59 ) |          | 0.858            | 0.99 ( 0.65 - 1.51 )  |          | 0.959            |
| <b>Time</b>                                  |                      |          |              | 3.65 ( 2.71 - 4.92 ) |          | <b>&lt;0.001</b> | 3.85 ( 2.83 - 5.22 )  |          | <b>&lt;0.001</b> |
| <b>Intervention*time<sup>c</sup></b>         |                      |          |              | 1.75 ( 1.12 - 2.74 ) |          | <b>0.015</b>     | 1.80 ( 1.14 - 2.84 )  |          | <b>0.012</b>     |
| <b>1) Socio-demographic characteristics</b>  |                      |          |              |                      |          |                  |                       |          |                  |
| <b>Age in years</b>                          |                      |          |              |                      |          |                  | 0.99 ( 0.97 - 1.02 )  |          | 0.555            |
| <b>Education</b>                             |                      |          |              |                      |          |                  | Ref.                  |          |                  |
| Never                                        |                      |          |              |                      |          |                  | Ref.                  |          |                  |
| Primary and more                             |                      |          |              |                      |          |                  | 1.07 ( 0.82 - 1.40 )  |          | 0.610            |
| <b>Religion</b>                              |                      |          |              |                      |          |                  | Ref.                  |          |                  |
| Christian                                    |                      |          |              |                      |          |                  | Ref.                  |          |                  |
| Muslim                                       |                      |          |              |                      |          |                  | 0.85 ( 0.57 - 1.29 )  |          | 0.453            |
| <b>Wealth index</b>                          |                      |          |              |                      |          |                  | Ref.                  |          |                  |
| Poor                                         |                      |          |              |                      |          |                  | Ref.                  |          |                  |
| Middle                                       |                      |          |              |                      |          |                  | 1.05 ( 0.79 - 1.38 )  |          | 0.749            |
| Rich                                         |                      |          |              |                      |          |                  | 0.98 ( 0.73 - 1.33 )  |          | 0.918            |
| <b>No. of children</b>                       |                      |          |              |                      |          |                  | 0.97 ( 0.88 - 1.07 )  |          | 0.552            |
| <b>Pregnancy intention</b>                   |                      |          |              |                      |          |                  | Ref.                  |          |                  |
| No                                           |                      |          |              |                      |          |                  | Ref.                  |          |                  |
| Yes                                          |                      |          |              |                      |          |                  | 0.94 ( 0.64 - 1.39 )  |          | 0.763            |
| Don't know                                   |                      |          |              |                      |          |                  | 0.94 ( 0.57 - 1.55 )  |          | 0.814            |
| <b>Partner's pregnancy intention</b>         |                      |          |              |                      |          |                  | Ref.                  |          |                  |
| No                                           |                      |          |              |                      |          |                  | Ref.                  |          |                  |
| Yes                                          |                      |          |              |                      |          |                  | 1.17 ( 0.76 - 1.80 )  |          | 0.474            |
| Don't know                                   |                      |          |              |                      |          |                  | 1.20 ( 0.77 - 1.87 )  |          | 0.432            |
| <b>History of unintended pregnancy</b>       |                      |          |              |                      |          |                  | Ref.                  |          |                  |
| No                                           |                      |          |              |                      |          |                  | Ref.                  |          |                  |
| Yes                                          |                      |          |              |                      |          |                  | 1.44 ( 1.13 - 1.85 )  |          | <b>0.004</b>     |
| <b>Multiple sex partners</b>                 |                      |          |              |                      |          |                  | Ref.                  |          |                  |
| No                                           |                      |          |              |                      |          |                  | Ref.                  |          |                  |
| Yes                                          |                      |          |              |                      |          |                  | 1.92 ( 1.13 - 3.24 )  |          | <b>0.015</b>     |
| <b>2) HIV-related characteristics</b>        |                      |          |              |                      |          |                  |                       |          |                  |
| <b>HIV status</b>                            |                      |          |              |                      |          |                  | Ref.                  |          |                  |
| Negative                                     |                      |          |              |                      |          |                  | Ref.                  |          |                  |
| Positive                                     |                      |          |              |                      |          |                  | 2.07 ( 1.07 - 3.99 )  |          | <b>0.031</b>     |
| <b>Partner's HIV status</b>                  |                      |          |              |                      |          |                  | Ref.                  |          |                  |
| Negative                                     |                      |          |              |                      |          |                  | Ref.                  |          |                  |
| Positive                                     |                      |          |              |                      |          |                  | 0.72 ( 0.36 - 1.43 )  |          | 0.345            |
| Don't know                                   |                      |          |              |                      |          |                  | 0.87 ( 0.62 - 1.21 )  |          | 0.405            |
| <b>Perceived risk for HIV/STIs</b>           |                      |          |              |                      |          |                  | Ref.                  |          |                  |
| No risk at all                               |                      |          |              |                      |          |                  | Ref.                  |          |                  |
| Small                                        |                      |          |              |                      |          |                  | 1.15 ( 0.83 - 1.61 )  |          | 0.398            |
| Moderate                                     |                      |          |              |                      |          |                  | 1.19 ( 0.84 - 1.69 )  |          | 0.320            |
| Great                                        |                      |          |              |                      |          |                  | 1.16 ( 0.79 - 1.72 )  |          | 0.446            |
| <b>3) HEC use</b>                            |                      |          |              |                      |          |                  |                       |          |                  |
| <b>Type of HECs</b>                          |                      |          |              |                      |          |                  | Ref.                  |          |                  |
| Injectables                                  |                      |          |              |                      |          |                  | Ref.                  |          |                  |
| Implants                                     |                      |          |              |                      |          |                  | 1.11 ( 0.86 - 1.42 )  |          | 0.426            |
| IUD                                          |                      |          |              |                      |          |                  | 1.18 ( 0.81 - 1.72 )  |          | 0.399            |
| Pill                                         |                      |          |              |                      |          |                  | 1.08 ( 0.68 - 1.72 )  |          | 0.753            |
| Female sterilization                         |                      |          |              |                      |          |                  | 2.74 ( 0.44 - 17.17 ) |          | 0.283            |
| <b>4) Other psychosocial characteristics</b> |                      |          |              |                      |          |                  |                       |          |                  |
| <b>HIV-related knowledge (HIV-KQ-18)</b>     |                      |          |              |                      |          |                  | 1.03 ( 0.99 - 1.08 )  |          | 0.148            |
| <b>Condom use self-efficacy scale</b>        |                      |          |              |                      |          |                  | 1.03 ( 1.01 - 1.04 )  |          | <b>&lt;0.001</b> |
| <b>Sexual Relationship Power Scale</b>       |                      |          |              |                      |          |                  | Ref.                  |          |                  |
| Low                                          |                      |          |              |                      |          |                  | Ref.                  |          |                  |
| Medium                                       |                      |          |              |                      |          |                  | 1.28 ( 0.98 - 1.67 )  |          | 0.066            |
| High                                         |                      |          |              |                      |          |                  | 1.44 ( 1.07 - 1.94 )  |          | <b>0.016</b>     |

OR: odds ratio; AOR: adjusted odds ratio; SD: standard deviation; HIV: human immunodeficiency virus; STI: sexually transmitted infection; HEC: highly effective contraceptive; IUD: intrauterine device

a. Adjusted for the cluster effect

b. Adjusted for age, education, religion, wealth index, number of children, pregnancy intention, partner's pregnancy intention, history of unintended pregnancy, multiple sex partnership, HIV status, partner's HIV status, risk perception of HIV/STIs, HIV-related knowledge, condom use self-efficacy, and sexual relationship control power.

c. Intervention\*time represents the status of the intervention group at follow-up in comparison with the control group at the baseline.

**Supplementary Table S15. Effects of intervention on the incidence of pregnancy among women at 2 months after enrollement**

| Variables                                    | Model 1                |          |         | Model 2              |          |              | Model 3                 |          |                 |
|----------------------------------------------|------------------------|----------|---------|----------------------|----------|--------------|-------------------------|----------|-----------------|
|                                              | OR                     | (95% CI) | p-value | AOR <sup>a</sup>     | (95% CI) | p-value      | AOR <sup>b</sup>        | (95% CI) | p-value         |
| <b>Intervention</b>                          |                        |          |         |                      |          |              |                         |          |                 |
| Control                                      | Ref.                   |          |         | Ref.                 |          |              | Ref.                    |          |                 |
| Intervention                                 | 0.69 ( 0.15 - 3.0905 ) |          | 0.624   | 0.69 ( 0.15 - 3.09 ) |          | <b>0.002</b> | 1.27 ( 0.19 - 8.65 )    |          | 0.804           |
| <b>1) Socio-demographic characteristics</b>  |                        |          |         |                      |          |              |                         |          |                 |
| <b>Age in years</b>                          |                        |          |         |                      |          |              |                         |          |                 |
|                                              |                        |          |         |                      |          |              | 1.13 ( 0.93 - 1.38 )    |          | 0.207           |
| <b>Education</b>                             |                        |          |         |                      |          |              |                         |          |                 |
| Never                                        |                        |          |         |                      |          |              | Ref.                    |          |                 |
| Primary and more                             |                        |          |         |                      |          |              | 1.13 ( 0.08 - 15.65 )   |          | 0.925           |
| <b>Religion</b>                              |                        |          |         |                      |          |              |                         |          |                 |
| Christian                                    |                        |          |         |                      |          |              | Ref.                    |          |                 |
| Muslim                                       |                        |          |         |                      |          |              |                         |          | perfect success |
| <b>Wealth index</b>                          |                        |          |         |                      |          |              |                         |          |                 |
| Poor                                         |                        |          |         |                      |          |              | Ref.                    |          |                 |
| Middle                                       |                        |          |         |                      |          |              | 3.38 ( 0.17 - 68.99 )   |          | 0.429           |
| Rich                                         |                        |          |         |                      |          |              | 3.36 ( 0.18 - 61.53 )   |          | 0.414           |
| <b>No. of children</b>                       |                        |          |         |                      |          |              |                         |          |                 |
|                                              |                        |          |         |                      |          |              | 0.59 ( 0.25 - 1.39 )    |          | 0.226           |
| <b>Pregnancy intention</b>                   |                        |          |         |                      |          |              |                         |          |                 |
| No                                           |                        |          |         |                      |          |              | Ref.                    |          |                 |
| Yes                                          |                        |          |         |                      |          |              | 0.12 ( 0.00 - 2.76 )    |          | 0.183           |
| Don't know                                   |                        |          |         |                      |          |              |                         |          | perfect success |
| <b>Partner's pregnancy intention</b>         |                        |          |         |                      |          |              |                         |          |                 |
| No                                           |                        |          |         |                      |          |              | Ref.                    |          |                 |
| Yes                                          |                        |          |         |                      |          |              | 2.12 ( 0.09 - 47.51 )   |          | 0.636           |
| Don't know                                   |                        |          |         |                      |          |              |                         |          | perfect success |
| <b>History of unintended pregnancy</b>       |                        |          |         |                      |          |              |                         |          |                 |
| No                                           |                        |          |         |                      |          |              | Ref.                    |          |                 |
| Yes                                          |                        |          |         |                      |          |              | 1.15 ( 0.15 - 8.78 )    |          | 0.890           |
| <b>Multiple sex partners</b>                 |                        |          |         |                      |          |              |                         |          |                 |
| No                                           |                        |          |         |                      |          |              | Ref.                    |          |                 |
| Yes                                          |                        |          |         |                      |          |              |                         |          | collinearity    |
| <b>2) HIV-related characteristics</b>        |                        |          |         |                      |          |              |                         |          |                 |
| <b>HIV status</b>                            |                        |          |         |                      |          |              |                         |          |                 |
| Negative                                     |                        |          |         |                      |          |              | Ref.                    |          |                 |
| Positive                                     |                        |          |         |                      |          |              | 1.07 ( 0.00 - 1320.72 ) |          | 0.986           |
| <b>Partner's HIV status</b>                  |                        |          |         |                      |          |              |                         |          |                 |
| Negative                                     |                        |          |         |                      |          |              | Ref.                    |          |                 |
| Positive                                     |                        |          |         |                      |          |              | 6.75 ( 0.01 - 8258.21 ) |          | 0.599           |
| Don't know                                   |                        |          |         |                      |          |              | 3.91 ( 0.29 - 52.16 )   |          | 0.302           |
| <b>Perceived risk for HIV/STIs</b>           |                        |          |         |                      |          |              |                         |          |                 |
| No risk at all                               |                        |          |         |                      |          |              | Ref.                    |          |                 |
| Small                                        |                        |          |         |                      |          |              | 0.93 ( 0.11 - 8.07 )    |          | 0.950           |
| Moderate                                     |                        |          |         |                      |          |              | 0.46 ( 0.04 - 4.70 )    |          | 0.512           |
| Great                                        |                        |          |         |                      |          |              |                         |          | perfect success |
| <b>3) HEC use</b>                            |                        |          |         |                      |          |              |                         |          |                 |
| <b>Type of HECs</b>                          |                        |          |         |                      |          |              |                         |          |                 |
| Injectables                                  |                        |          |         |                      |          |              | Ref.                    |          |                 |
| Implants                                     |                        |          |         |                      |          |              | 3.55 ( 0.48 - 26.01 )   |          | 0.213           |
| IUD                                          |                        |          |         |                      |          |              | 1.93 ( 0.11 - 35.13 )   |          | 0.656           |
| Pill                                         |                        |          |         |                      |          |              |                         |          | perfect success |
| Female sterilization                         |                        |          |         |                      |          |              |                         |          | collinearity    |
| <b>4) Other psychosocial characteristics</b> |                        |          |         |                      |          |              |                         |          |                 |
| <b>HIV-related knowledge (HIV-KQ-18)</b>     |                        |          |         |                      |          |              |                         |          |                 |
|                                              |                        |          |         |                      |          |              | 0.96 ( 0.64 - 1.45 )    |          | 0.843           |
| <b>Condom use self-efficacy scale</b>        |                        |          |         |                      |          |              |                         |          |                 |
|                                              |                        |          |         |                      |          |              | 0.90 ( 0.81 - 0.99 )    |          | <b>0.039</b>    |
| <b>Sexual Relationship Power Scale</b>       |                        |          |         |                      |          |              |                         |          |                 |
| Low                                          |                        |          |         |                      |          |              | Ref.                    |          |                 |
| Medium                                       |                        |          |         |                      |          |              | 0.52 ( 0.05 - 5.38 )    |          | 0.580           |
| High                                         |                        |          |         |                      |          |              | 3.74 ( 0.33 - 41.91 )   |          | 0.285           |

OR: odds ratio; AOR: adjusted odds ratio; SD: standard deviation; HIV: human immunodeficiency virus; STI: sexually transmitted infection; HEC: highly effective contraceptive; IUD: intrauterine device

a. Adjusted for the cluster effect

b. Adjusted for age, education, religion, wealth index, number of children, pregnancy intention, partner's pregnancy intention, history of unintended pregnancy, multiple sex partnership, HIV status, partner's HIV status, risk perception of HIV/STIs, HIV-related knowledge, condom use self-efficacy, and sexual relationship control power.

c. Intervention\*time represents the status of the intervention group at follow-up in comparison with the control group at the baseline.

**Supplementary Table S16. Effects of intervention on the incidence of pregnancy among women at 4 months after enrollement**

| Variables                                    | Model 1                |          |         | Model 2              |          |         | Model 3               |          |                 |
|----------------------------------------------|------------------------|----------|---------|----------------------|----------|---------|-----------------------|----------|-----------------|
|                                              | OR                     | (95% CI) | p-value | AOR <sup>a</sup>     | (95% CI) | p-value | AOR <sup>b</sup>      | (95% CI) | p-value         |
| <b>Intervention</b>                          |                        |          |         |                      |          |         |                       |          |                 |
| Control                                      | Ref.                   |          |         | Ref.                 |          |         | Ref.                  |          |                 |
| Intervention                                 | 0.47 ( 0.09 - 2.5689 ) |          | 0.382   | 0.47 ( 0.09 - 2.57 ) |          | 0.382   | 0.24 ( 0.00 - 16.42 ) |          | 0.506           |
| <b>1) Socio-demographic characteristics</b>  |                        |          |         |                      |          |         |                       |          |                 |
| <b>Age in years</b>                          |                        |          |         |                      |          |         |                       |          |                 |
|                                              |                        |          |         |                      |          |         | 0.86 ( 0.54 - 1.35 )  |          | 0.505           |
| <b>Education</b>                             |                        |          |         |                      |          |         |                       |          |                 |
| Never                                        |                        |          |         |                      |          |         | Ref.                  |          |                 |
| Primary and more                             |                        |          |         |                      |          |         |                       |          | perfect success |
| <b>Religion</b>                              |                        |          |         |                      |          |         |                       |          |                 |
| Christian                                    |                        |          |         |                      |          |         | Ref.                  |          |                 |
| Muslim                                       |                        |          |         |                      |          |         |                       |          | perfect success |
| <b>Wealth index</b>                          |                        |          |         |                      |          |         |                       |          |                 |
| Poor                                         |                        |          |         |                      |          |         | Ref.                  |          |                 |
| Middle                                       |                        |          |         |                      |          |         | 0.12 ( 0.00 - 5.29 )  |          | 0.274           |
| Rich                                         |                        |          |         |                      |          |         |                       |          | perfect success |
| <b>No. of children</b>                       |                        |          |         |                      |          |         |                       |          |                 |
|                                              |                        |          |         |                      |          |         | 1.06 ( 0.25 - 4.46 )  |          | 0.938           |
| <b>Pregnancy intention</b>                   |                        |          |         |                      |          |         |                       |          |                 |
| No                                           |                        |          |         |                      |          |         | Ref.                  |          |                 |
| Yes                                          |                        |          |         |                      |          |         | 0.03 ( 0.00 - 19.06 ) |          | 0.281           |
| Don't know                                   |                        |          |         |                      |          |         | 0.05 ( 0.00 - 23.60 ) |          | 0.335           |
| <b>Partner's pregnancy intention</b>         |                        |          |         |                      |          |         |                       |          |                 |
| No                                           |                        |          |         |                      |          |         | Ref.                  |          |                 |
| Yes                                          |                        |          |         |                      |          |         | 0.25 ( 0.00 - 32.44 ) |          | 0.578           |
| Don't know                                   |                        |          |         |                      |          |         |                       |          | perfect success |
| <b>History of unintended pregnancy</b>       |                        |          |         |                      |          |         |                       |          |                 |
| No                                           |                        |          |         |                      |          |         | Ref.                  |          |                 |
| Yes                                          |                        |          |         |                      |          |         | 2.37 ( 0.09 - 65.37 ) |          | 0.609           |
| <b>Multiple sex partners</b>                 |                        |          |         |                      |          |         |                       |          |                 |
| No                                           |                        |          |         |                      |          |         | Ref.                  |          |                 |
| Yes                                          |                        |          |         |                      |          |         |                       |          | perfect success |
| <b>2) HIV-related characteristics</b>        |                        |          |         |                      |          |         |                       |          |                 |
| <b>HIV status</b>                            |                        |          |         |                      |          |         |                       |          |                 |
| Negative                                     |                        |          |         |                      |          |         | Ref.                  |          |                 |
| Positive                                     |                        |          |         |                      |          |         |                       |          | perfect success |
| <b>Partner's HIV status</b>                  |                        |          |         |                      |          |         |                       |          |                 |
| Negative                                     |                        |          |         |                      |          |         | Ref.                  |          |                 |
| Positive                                     |                        |          |         |                      |          |         |                       |          | perfect success |
| Don't know                                   |                        |          |         |                      |          |         |                       |          | perfect success |
| <b>Perceived risk for HIV/STIs</b>           |                        |          |         |                      |          |         |                       |          |                 |
| No risk at all                               |                        |          |         |                      |          |         | Ref.                  |          |                 |
| Small                                        |                        |          |         |                      |          |         | 0.27 ( 0.01 - 6.67 )  |          | 0.427           |
| Moderate                                     |                        |          |         |                      |          |         | 1.01 ( 0.05 - 20.07 ) |          | 0.997           |
| Great                                        |                        |          |         |                      |          |         |                       |          | perfect success |
| <b>3) HEC use</b>                            |                        |          |         |                      |          |         |                       |          |                 |
| <b>Type of HECs</b>                          |                        |          |         |                      |          |         |                       |          |                 |
| Injectables                                  |                        |          |         |                      |          |         | Ref.                  |          |                 |
| Implants                                     |                        |          |         |                      |          |         | 0.16 ( 0.01 - 3.19 )  |          | 0.228           |
| IUD                                          |                        |          |         |                      |          |         |                       |          | perfect success |
| Pill                                         |                        |          |         |                      |          |         | 0.93 ( 0.02 - 43.06 ) |          | 0.970           |
| Female sterilization                         |                        |          |         |                      |          |         |                       |          | collinearity    |
| <b>4) Other psychosocial characteristics</b> |                        |          |         |                      |          |         |                       |          |                 |
| <b>HIV-related knowledge (HIV-KQ-18)</b>     |                        |          |         |                      |          |         |                       |          |                 |
|                                              |                        |          |         |                      |          |         | 0.87 ( 0.56 - 1.36 )  |          | 0.543           |
| <b>Condom use self-efficacy scale</b>        |                        |          |         |                      |          |         |                       |          |                 |
|                                              |                        |          |         |                      |          |         | 1.06 ( 0.91 - 1.23 )  |          | 0.476           |
| <b>Sexual Relationship Power Scale</b>       |                        |          |         |                      |          |         |                       |          |                 |
| Low                                          |                        |          |         |                      |          |         | Ref.                  |          |                 |
| Medium                                       |                        |          |         |                      |          |         | 0.37 ( 0.01 - 9.78 )  |          | 0.555           |
| High                                         |                        |          |         |                      |          |         | 0.75 ( 0.03 - 17.19 ) |          | 0.859           |

OR: odds ratio; AOR: adjusted odds ratio; SD: standard deviation; HIV: human immunodeficiency virus; STI: sexually transmitted infection; HEC: highly effective contraceptive; IUD: intrauterine device

a. Adjusted for the cluster effect

b. Adjusted for age, education, religion, wealth index, number of children, pregnancy intention, partner's pregnancy intention, history of unintended pregnancy, multiple sex partnership, HIV status, partner's HIV status, risk perception of HIV/STIs, HIV-related knowledge, condom use self-efficacy, and sexual relationship control power.

c. Intervention\*time represents the status of the intervention group at follow-up in comparison with the control group at the baseline.

**Supplementary Table S17. Effects of intervention on the incidence of pregnancy among women at 8 months after enrollement**

| Variables                                    | Model 1                |          |         | Model 2              |          |         | Model 3                |          |                 |
|----------------------------------------------|------------------------|----------|---------|----------------------|----------|---------|------------------------|----------|-----------------|
|                                              | OR                     | (95% CI) | p-value | AOR <sup>a</sup>     | (95% CI) | p-value | AOR <sup>b</sup>       | (95% CI) | p-value         |
| <b>Intervention</b>                          |                        |          |         |                      |          |         |                        |          |                 |
| Control                                      | Ref.                   |          |         | Ref.                 |          |         | Ref.                   |          |                 |
| Intervention                                 | 0.38 ( 0.07 - 1.9557 ) |          | 0.246   | 0.38 ( 0.07 - 2.19 ) |          | 0.281   | 0.40 ( 0.02 - 8.19 )   |          | 0.552           |
| <b>1) Socio-demographic characteristics</b>  |                        |          |         |                      |          |         |                        |          |                 |
| <b>Age in years</b>                          |                        |          |         |                      |          |         |                        |          |                 |
|                                              |                        |          |         |                      |          |         | 0.85 ( 0.64 - 1.13 )   |          | 0.263           |
| <b>Education</b>                             |                        |          |         |                      |          |         |                        |          |                 |
| Never                                        |                        |          |         |                      |          |         | Ref.                   |          | perfect success |
| Primary and more                             |                        |          |         |                      |          |         |                        |          | perfect success |
| <b>Religion</b>                              |                        |          |         |                      |          |         |                        |          |                 |
| Christian                                    |                        |          |         |                      |          |         | Ref.                   |          | perfect success |
| Muslim                                       |                        |          |         |                      |          |         |                        |          | perfect success |
| <b>Wealth index</b>                          |                        |          |         |                      |          |         |                        |          |                 |
| Poor                                         |                        |          |         |                      |          |         | Ref.                   |          |                 |
| Middle                                       |                        |          |         |                      |          |         | 0.08 ( 0.01 - 1.14 )   |          | 0.062           |
| Rich                                         |                        |          |         |                      |          |         |                        |          | perfect success |
| <b>No. of children</b>                       |                        |          |         |                      |          |         |                        |          |                 |
|                                              |                        |          |         |                      |          |         | 1.23 ( 0.40 - 3.83 )   |          | 0.716           |
| <b>Pregnancy intention</b>                   |                        |          |         |                      |          |         |                        |          |                 |
| No                                           |                        |          |         |                      |          |         | Ref.                   |          |                 |
| Yes                                          |                        |          |         |                      |          |         |                        |          | perfect success |
| Don't know                                   |                        |          |         |                      |          |         |                        |          | perfect success |
| <b>Partner's pregnancy intention</b>         |                        |          |         |                      |          |         |                        |          |                 |
| No                                           |                        |          |         |                      |          |         | Ref.                   |          |                 |
| Yes                                          |                        |          |         |                      |          |         |                        |          | perfect success |
| Don't know                                   |                        |          |         |                      |          |         |                        |          | perfect success |
| <b>History of unintended pregnancy</b>       |                        |          |         |                      |          |         |                        |          |                 |
| No                                           |                        |          |         |                      |          |         | Ref.                   |          |                 |
| Yes                                          |                        |          |         |                      |          |         | 0.92 ( 0.05 - 16.15 )  |          | 0.955           |
| <b>Multiple sex partners</b>                 |                        |          |         |                      |          |         |                        |          |                 |
| No                                           |                        |          |         |                      |          |         | Ref.                   |          |                 |
| Yes                                          |                        |          |         |                      |          |         |                        |          | perfect success |
| <b>2) HIV-related characteristics</b>        |                        |          |         |                      |          |         |                        |          |                 |
| <b>HIV status</b>                            |                        |          |         |                      |          |         |                        |          |                 |
| Negative                                     |                        |          |         |                      |          |         | Ref.                   |          |                 |
| Positive                                     |                        |          |         |                      |          |         | 6.80 ( 0.17 - 272.13 ) |          | 0.309           |
| <b>Partner's HIV status</b>                  |                        |          |         |                      |          |         |                        |          |                 |
| Negative                                     |                        |          |         |                      |          |         | Ref.                   |          |                 |
| Positive                                     |                        |          |         |                      |          |         |                        |          | perfect success |
| Don't know                                   |                        |          |         |                      |          |         |                        |          | perfect success |
| <b>Perceived risk for HIV/STIs</b>           |                        |          |         |                      |          |         |                        |          |                 |
| No risk at all                               |                        |          |         |                      |          |         | Ref.                   |          |                 |
| Small                                        |                        |          |         |                      |          |         | 2.90 ( 0.34 - 24.54 )  |          | 0.328           |
| Moderate                                     |                        |          |         |                      |          |         |                        |          | collinearity    |
| Great                                        |                        |          |         |                      |          |         |                        |          | perfect success |
| <b>3) HEC use</b>                            |                        |          |         |                      |          |         |                        |          |                 |
| <b>Type of HECs</b>                          |                        |          |         |                      |          |         |                        |          |                 |
| Injectables                                  |                        |          |         |                      |          |         | Ref.                   |          |                 |
| Implants                                     |                        |          |         |                      |          |         | 0.09 ( 0.00 - 2.08 )   |          | 0.133           |
| IUD                                          |                        |          |         |                      |          |         |                        |          | perfect success |
| Pill                                         |                        |          |         |                      |          |         | 0.80 ( 0.04 - 16.43 )  |          | 0.885           |
| Female sterilization                         |                        |          |         |                      |          |         |                        |          | perfect success |
| <b>4) Other psychosocial characteristics</b> |                        |          |         |                      |          |         |                        |          |                 |
| <b>HIV-related knowledge (HIV-KQ-18)</b>     |                        |          |         |                      |          |         |                        |          |                 |
|                                              |                        |          |         |                      |          |         | 0.86 ( 0.56 - 1.34 )   |          | 0.507           |
| <b>Condom use self-efficacy scale</b>        |                        |          |         |                      |          |         |                        |          |                 |
|                                              |                        |          |         |                      |          |         | 0.92 ( 0.79 - 1.07 )   |          | 0.255           |
| <b>Sexual Relationship Power Scale</b>       |                        |          |         |                      |          |         |                        |          |                 |
| Low                                          |                        |          |         |                      |          |         | Ref.                   |          |                 |
| Medium                                       |                        |          |         |                      |          |         | 2.24 ( 0.15 - 34.45 )  |          | 0.564           |
| High                                         |                        |          |         |                      |          |         | 3.01 ( 0.08 - 113.51 ) |          | 0.552           |

OR: odds ratio; AOR: adjusted odds ratio; SD: standard deviation; HIV: human immunodeficiency virus; STI: sexually transmitted infection; HEC: highly effective contraceptive; IUD: intrauterine device

a. Adjusted for the cluster effect

b. Adjusted for age, education, religion, wealth index, number of children, pregnancy intention, partner's pregnancy intention, history of unintended pregnancy, multiple sex partnership, HIV status, partner's HIV status, risk perception of HIV/STIs, HIV-related knowledge, condom use self-efficacy, and sexual relationship control power.

c. Intervention\*time represents the status of the intervention group at follow-up in comparison with the control group at the baseline.
